# Supplementary material
Source: publisher figshare collection journal article supplement (https://gsajournals.figshare.com/ndownloader/files/24115847)
Supplement: Supplementary file 1 [file 24115847]

## Sheet: Sheet1
Table S8 All NLR genes detected by NLR-Annotator in giant sequoia 2.0
Chr	NLR_name	Status	NLR_start	NLR_end	Strand	Motifs	CC?	TIR?	RNL?	OverlapsGene?	Gene Annotation
chr1	chr1_nlr_1	complete	53685122	53687482	+	1,4,5,10,3,12,7,11,11,11,11,11,9,11
chr1	chr1_nlr_10	complete (pseudogene)	166050852	166053075	+	18,15,1,4,5,3,12,7,9		TIR
chr1	chr1_nlr_100	complete (pseudogene)	313441841	313446546	+	18,15,1,4,5,10,3,12,7,11,11,11,11,11,9,11,9,9,11,11,11,11,11,11		TIR
chr1	chr1_nlr_101	complete	313603158	313607206	+	18,13,1,4,5,10,3,12,7,11,11,11,11,11,9,11,11,11,11		TIR		Yes	jg681397
chr1	chr1_nlr_102	complete (pseudogene)	313804375	313807767	+	18,15,1,4,5,10,3,12,7,11,11,11,11,9,11,9,9,11		TIR
chr1	chr1_nlr_103	complete (pseudogene)	317218778	317222948	+	18,13,1,4,5,10,3,12,7,11,9,11,11,11,11,9,11,9,9,11,11,19		TIR		Yes	jg682033
chr1	chr1_nlr_104	partial	317583568	317584075	+	4,5,10,8
chr1	chr1_nlr_105	complete	317588037	317591311	+	18,13,1,4,5,10,3,12,7,11,11,11,11,9,11,9,11,11,11		TIR		Yes	jg682097
chr1	chr1_nlr_106	complete	319062345	319065926	+	1,4,5,10,3,2,7,11,11,11,11,11,11	CC		RNL	Yes	jg682383
chr1	chr1_nlr_107	partial (pseudogene)	320552291	320552661	+	1,4,5
chr1	chr1_nlr_108	complete (pseudogene)	321535228	321538878	+	18,15,1,4,5,10,12,7,11		TIR
chr1	chr1_nlr_109	complete (pseudogene)	323391226	323398058	+	18,15,1,4,5,10,3,12,7,9,11,11,11,11,11,11,11,11,11,11,11,11,11,11,11,11,11,11,11,11,11,11,11,11,11,11,11,11,11,11,11,11,11,11,11,11,11,11,11,11,11,11,11		TIR
chr1	chr1_nlr_11	partial (pseudogene)	166935588	166937017	+	15,13,1,4,5,10,3,12,7		TIR
chr1	chr1_nlr_110	complete (pseudogene)	341274314	341278114	+	15,1,4,5,10,3,12,7,9,9,9,11,11		TIR
chr1	chr1_nlr_111	complete (pseudogene)	341281988	341287372	+	18,13,1,4,5,10,3,12,7,9,11,11,11,9,11,11,11,19		TIR
chr1	chr1_nlr_112	complete (pseudogene)	351208243	351211748	+	18,15,1,4,5,10,3,12,7,9,11,9,11,11,11,11,11,11,11		TIR
chr1	chr1_nlr_113	complete	353522346	353528774	+	18,15,1,4,5,10,3,12,7,9,11,11,11,11,11,11,11,11,11,11,11,11,11,11,11,11,11,11,11,11,11,11,11,11,11,11,11,11,11,11,11,11,11,11,11,11		TIR		Yes	jg687137
chr1	chr1_nlr_114	complete (pseudogene)	353812381	353818138	+	18,15,1,4,5,10,3,12,7,11,11,11,11,11,11,11,11,11,11,11,11,11,11,11,11,11,11,11,11,11,19		TIR
chr1	chr1_nlr_115	partial	354053687	354055323	+	18,15,1,4,5,10,3,12,7		TIR
chr1	chr1_nlr_116	complete	365408135	365410634	+	17,16,1,6,4,5,10,3,12,2,8,7,9,9,9,11,11,11,11	CC
chr1	chr1_nlr_117	complete	366063806	366066320	+	17,16,1,6,4,5,10,3,2,7,9,9,9,11,11,11,11	CC			Yes	jg688839.2
chr1	chr1_nlr_118	partial	371858367	371860249	+	18,15,1,4,5,10,3,7		TIR		Yes	jg689703
chr1	chr1_nlr_119	complete (pseudogene)	372435099	372439798	+	18,13,1,4,5,10,3,11,11,11,11,9,9,11,19		TIR
chr1	chr1_nlr_12	complete	167220732	167223861	+	18,13,1,4,5,10,3,12,7,11,9,11,11,9,11,11		TIR		Yes	jg656007.1
chr1	chr1_nlr_120	partial (pseudogene)	427058371	427060860	+	4,5,10,3,12,7,11,11,11,11,19,11,11,11,11,11,11,11,11,11,11,11
chr1	chr1_nlr_121	complete	446384086	446386878	+	18,15,1,4,5,10,3,7,9,11,11		TIR		Yes	jg700198
chr1	chr1_nlr_122	complete	446420247	446423033	+	18,15,1,4,5,10,3,7,9,11		TIR		Yes	jg700203
chr1	chr1_nlr_123	complete	446467600	446470386	+	18,15,1,4,5,10,3,7,9,11,11		TIR
chr1	chr1_nlr_124	complete	451039104	451042263	+	18,15,1,4,5,10,3,12,7,11,11,9,11,11,9,11,9,11,11		TIR		Yes	jg700990
chr1	chr1_nlr_125	complete	500039484	500042220	+	15,1,5,10,3,7,9,11,11,11		TIR
chr1	chr1_nlr_126	complete (pseudogene)	530742076	530746371	+	18,15,13,1,4,5,10,3,12,7,11,9,9,11,11,11,11,11,9,11,11,11,11		TIR
chr1	chr1_nlr_127	partial	533418711	533419608	+	1,5,10,3,7				Yes	jg711885
chr1	chr1_nlr_128	complete	533514607	533516368	+	1,5,10,3,12,11,11				Yes	jg711902
chr1	chr1_nlr_129	partial (pseudogene)	533876834	533878783	+	15,1,5,10,3		TIR
chr1	chr1_nlr_13	complete	167360848	167363903	+	18,13,1,4,5,10,3,12,7,9,11,9,11,9,9,11,11,11		TIR		Yes	jg656038
chr1	chr1_nlr_130	complete (pseudogene)	550350891	550353773	+	1,4,5,11,11,11,19,11,11,11
chr1	chr1_nlr_131	partial (pseudogene)	550404093	550404747	+	1,5,10,3,12
chr1	chr1_nlr_132	complete	551089573	551094364	+	18,15,1,4,5,10,3,12,7,11,11,11,11,11,11,11,11,11,11,11,11,11,11		TIR
chr1	chr1_nlr_133	complete (pseudogene)	551320611	551323389	+	1,4,5,3,12,7,11,11,11,11,9,9,11,11,11,11,11,11,11,11,11
chr1	chr1_nlr_134	complete	552448803	552455196	+	18,15,1,4,5,10,3,12,7,11,11,11,11,11,11		TIR
chr1	chr1_nlr_135	partial (pseudogene)	552629061	552630736	+	18,1,4,5,3,7		TIR
chr1	chr1_nlr_136	complete	552806264	552808421	+	1,4,5,10,3,12,7,11,11,11,11,11,11,11,11,11,11,11,11,11
chr1	chr1_nlr_137	complete	552815336	552817493	+	1,4,5,10,3,12,7,11,11,11,11,11,11,11,11,11,11,11,11,11
chr1	chr1_nlr_138	complete (pseudogene)	552847853	552850154	+	1,4,5,10,3,12,7,11,11,11,11,11,11,11,11,11,11,11,11,9
chr1	chr1_nlr_139	complete	553266911	553270160	+	1,4,5,7,11,11,11,11,11,11,11,11,11,11,11,11
chr1	chr1_nlr_14	complete	167503850	167507066	+	18,13,1,4,5,10,3,12,7,11,11,9,9,9,9,11,11,11		TIR		Yes	jg656057
chr1	chr1_nlr_140	complete (pseudogene)	581126321	581130652	+	18,15,13,1,4,5,10,3,7,11,11,11,11,11,11,11,9,11,9,11,11,19		TIR
chr1	chr1_nlr_141	complete	583467333	583472840	+	18,13,1,4,5,10,3,12,7,11,11,11,11,9,9,11,9,11,11,19		TIR
chr1	chr1_nlr_142	complete (pseudogene)	589513964	589515825	+	1,4,5,3,12,7,11,11,11,11,11,11,11,11,11
chr1	chr1_nlr_143	complete	608114247	608116576	+	1,4,5,10,3,12,7,11,11,11,11,11,11,11,11,11,11,11,11,11,9,11
chr1	chr1_nlr_144	complete (pseudogene)	610994817	610998769	+	18,13,1,4,5,10,3,12,7,11,11,9,11,11,11,11,11		TIR
chr1	chr1_nlr_145	complete (pseudogene)	611014655	611017646	+	13,1,4,5,10,3,12,7,11,11,9,11,11,11,11,11		TIR
chr1	chr1_nlr_146	complete (pseudogene)	689746904	689749268	+	16,1,6,4,5,10,3,12,2,8,7,9,11,11,11,11	CC
chr1	chr1_nlr_147	complete	757951227	757953550	+	1,4,5,10,3,12,7,11,11
chr1	chr1_nlr_148	complete	758223064	758227370	+	18,15,1,4,5,10,3,12,7,9,11,11,11,11,11		TIR		Yes	jg750063
chr1	chr1_nlr_149	partial (pseudogene)	759126255	759128651	+	18,15,1,4,5,10,3,12,7		TIR
chr1	chr1_nlr_15	complete	171828211	171831597	+	18,15,13,1,4,5,10,3,12,7,11,11,11		TIR		Yes	jg656815
chr1	chr1_nlr_150	complete	759582593	759585528	+	18,15,1,4,5,10,3,12,7,11,11,11,11		TIR		Yes	jg750308
chr1	chr1_nlr_151	complete	834973798	834976090	+	1,4,5,3,7,11,11,11,11,11,11,11,11,11
chr1	chr1_nlr_152	complete (pseudogene)	912834289	912838500	+	18,13,1,4,5,10,3,7,11,11,11,11,11,11,11,9,11,11,11,11,11,11,11,11,11,11,11,11,11		TIR
chr1	chr1_nlr_153	partial (pseudogene)	931988777	931991833	+	18,1,4,5,10,7		TIR
chr1	chr1_nlr_154	complete	981228234	981231016	+	18,15,13,1,4,5,10,3,12,7,11,11,11,11,11		TIR		Yes	jg788733
chr1	chr1_nlr_155	complete	947590563	947592633	-	1,5,10,3,12,2,7,9,9,11,11,9,9,11,11,11	CC
chr1	chr1_nlr_156	complete	912029407	912033792	-	18,15,1,4,5,10,3,12,7,11,11,11,11,11,11,11,11,11,11,11		TIR		Yes	jg776472
chr1	chr1_nlr_157	complete (pseudogene)	911884178	911887841	-	18,15,1,4,5,10,3,12,7,9,11,11,11,11,11,11,9,11,11,11,11,9,11		TIR		Yes	jg776444
chr1	chr1_nlr_158	complete (pseudogene)	834825736	834828142	-	1,4,5,10,3,12,7,11,11,11,11,11,11,11,11,11,11,11,11,11,11,11
chr1	chr1_nlr_159	complete (pseudogene)	796956609	796966267	-	1,6,4,10,3,12,2,7,9,11,9,11,11,9	CC
chr1	chr1_nlr_16	complete	173847753	173850673	+	18,15,1,4,5,10,3,7,11,11		TIR		Yes	jg657224
chr1	chr1_nlr_160	partial (pseudogene)	718243359	718243936	-	2,8,7
chr1	chr1_nlr_161	partial (pseudogene)	718233424	718234001	-	2,8,7
chr1	chr1_nlr_162	complete (pseudogene)	606279627	606282183	-	17,16,1,6,4,5,10,3,12,2,8,7,9,9,11,11,11,11,11	CC
chr1	chr1_nlr_163	partial (pseudogene)	602559947	602561782	-	18,6,4,5	CC	TIR
chr1	chr1_nlr_164	complete	599682274	599685303	-	18,15,13,1,4,5,10,3,12,7,11,11,11,9,9,11,11		TIR		Yes	jg722281
chr1	chr1_nlr_165	complete (pseudogene)	599635876	599638351	-	18,13,1,4,5,10,3,12,7,11,11,11		TIR
chr1	chr1_nlr_166	complete (pseudogene)	599522228	599525206	-	18,13,1,4,5,10,3,12,7,11,11,11,9,9,9,11,11		TIR
chr1	chr1_nlr_167	complete	599077267	599080626	-	18,13,1,4,5,10,3,12,7,11,11,11,9,11,11,11		TIR		Yes	jg722189
chr1	chr1_nlr_168	complete (pseudogene)	598875494	598878108	-	18,13,1,4,5,10,3,12,11,11,11		TIR
chr1	chr1_nlr_169	complete	581934158	581936883	-	18,15,13,1,4,5,10,3,12,7,11,11,11		TIR		Yes	jg719221.2
chr1	chr1_nlr_17	complete (pseudogene)	174542982	174545815	+	18,15,13,1,4,5,10,3,12,7,11,11		TIR
chr1	chr1_nlr_170	complete	561471151	561473011	-	1,4,5,10,3,12,7,11,11,11,11,11,11,11,11,11				Yes	jg716142
chr1	chr1_nlr_171	complete (pseudogene)	553144344	553146498	-	1,4,5,10,3,12,7,9,11,11,11,11,11,11,11,11,11,11,11
chr1	chr1_nlr_172	complete	539788928	539790927	-	1,5,10,3,11,11,11,11				Yes	jg712908
chr1	chr1_nlr_173	complete	530554725	530558358	-	18,15,13,1,4,5,10,3,12,7,9,11,11,11,11,9,11,11,11,11,11,11,11,9,11,11,11		TIR		Yes	jg711451
chr1	chr1_nlr_174	complete (pseudogene)	529146515	529152120	-	1,4,5,10,3,12,7,11,11,11,11,11,11,11,11,9,9,11
chr1	chr1_nlr_175	complete	527845233	527849055	-	18,15,13,1,4,5,10,3,12,7,9,11,11,11,11,9,11,11,11,11,11,11,11,11,9,11,11,11		TIR		Yes	jg710991
chr1	chr1_nlr_176	complete	527697647	527701546	-	18,15,13,1,4,5,10,3,12,7,9,11,11,11,11,9,11,11,11,11,11,11,11,11,9,11,11,11,11		TIR
chr1	chr1_nlr_177	complete	520065331	520067344	-	1,4,5,10,3,12,7,11,11,11,11,11,11,11,11,11,11,11,11				Yes	jg710037
chr1	chr1_nlr_178	complete	498356309	498358014	-	1,5,10,3,9,11,11,11				Yes	jg706908
chr1	chr1_nlr_179	partial	497942549	497943458	-	1,5,10,3,7
chr1	chr1_nlr_18	complete	176866471	176869258	+	18,15,1,4,5,10,3,12,7,9,11,11		TIR		Yes	jg657798.2
chr1	chr1_nlr_180	complete	480234434	480238092	-	18,13,1,4,5,10,3,12,7,11,11,11,9,11,9,11,11,9,11,9		TIR		Yes	jg704942
chr1	chr1_nlr_181	complete	457081411	457084085	-	1,6,4,10,3,2,7,11,11,11,11,11,11,11	CC		RNL	Yes	jg701831
chr1	chr1_nlr_182	partial (pseudogene)	453230324	453233656	-	18,13,4,5,10,3,12,7,11,11,9,11,11,11,11,9,11,9,9,11		TIR
chr1	chr1_nlr_183	complete	427941214	427943744	-	1,5,10,3,7,9,11,11,11,11,11,11,11,11,11,11,11,11
chr1	chr1_nlr_184	complete	365076278	365078747	-	17,16,1,6,4,5,10,3,12,2,8,7,9,9,9,11,11,11,11	CC
chr1	chr1_nlr_185	complete	349895016	349900138	-	18,15,1,4,5,10,3,12,7,11,11,11,11,11,11,11,11,11,11,11,11,11,11,11,11,11,11,11,11,11,11		TIR		Yes	jg686566
chr1	chr1_nlr_186	partial	326941818	326943086	-	4,5,10,3,12,7,11,11
chr1	chr1_nlr_187	complete (pseudogene)	323761741	323764835	-	18,13,1,4,5,10,3,12,7,11,11,11,11,9,11,11,11,11,11,11,9		TIR
chr1	chr1_nlr_188	complete (pseudogene)	323600250	323611058	-	18,15,1,4,5,10,3,12,7,9,11,11,11,11,11,11,11,11,11,11,11,11,11,11,11,11,11,11,11,11,11,11,11,11,11,11,11,11,11,11,11,11,11,11,11,11,11,11,11,11,11,11,9,11		TIR		Yes	jg683048
chr1	chr1_nlr_189	complete	323243773	323246711	-	1,4,5,10,3,2,7,11,11,11,11,11,11,11	CC		RNL
chr1	chr1_nlr_19	complete (pseudogene)	177587229	177590762	+	18,13,1,4,5,10,3,12,7,11,11,11,11,11,11,11,11,9,11,11,11		TIR
chr1	chr1_nlr_190	partial	321901938	321903145	-	18,15,13,1,4,5,10		TIR		Yes	jg682714
chr1	chr1_nlr_191	complete	284982071	284984927	-	18,13,1,4,5,10,3,12,7,11,9,11,9,11,9,11,11,11		TIR		Yes	jg676890
chr1	chr1_nlr_192	complete (pseudogene)	284904300	284907174	-	18,13,1,4,5,10,3,12,7,11,11,11,9,11,9,11,11		TIR		Yes	jg676877
chr1	chr1_nlr_193	complete (pseudogene)	275925950	275928889	-	18,15,1,4,5,10,3,12,7,11,11,11,11,11,11,11		TIR		Yes	jg675541
chr1	chr1_nlr_194	complete (pseudogene)	275861722	275864645	-	18,15,1,4,5,10,3,12,7,11,11,11,9,11,11,11,11,11		TIR		Yes	jg675527
chr1	chr1_nlr_195	complete	275811619	275814470	-	18,15,1,4,5,10,3,12,7,11,11,9,11,11,11,11		TIR		Yes	jg675524
chr1	chr1_nlr_196	complete	275797600	275800476	-	18,15,1,4,5,10,3,12,7,11,11,9,11,11,11,11		TIR
chr1	chr1_nlr_197	complete	271742674	271744318	-	1,4,5,10,3,11,11,11,11,9,9,11				Yes	jg674890
chr1	chr1_nlr_198	complete	269986940	269990664	-	18,15,1,4,5,3,12,7,11,11,11,11,11,11,11,11		TIR
chr1	chr1_nlr_199	complete	269753742	269757476	-	18,15,1,4,5,10,3,12,7,11,11,11,11,11		TIR
chr1	chr1_nlr_2	partial (pseudogene)	55415297	55416084	+	3,12,2				Yes	jg632925
chr1	chr1_nlr_20	complete (pseudogene)	177733124	177735942	+	18,13,1,4,5,10,3,12,7,11,11,11		TIR
chr1	chr1_nlr_200	partial	266650993	266652688	-	18,15,1,4,5,10,3,12,7		TIR
chr1	chr1_nlr_201	complete	265531492	265535202	-	18,15,13,1,4,5,10,3,12,7,11,11,11,11,11,11,11,11,19,11,11,11		TIR		Yes	jg673947
chr1	chr1_nlr_202	complete (pseudogene)	265436107	265439914	-	18,15,1,4,5,10,3,12,7,11,11,11,11,11,11,11,11,11,11		TIR
chr1	chr1_nlr_203	complete (pseudogene)	265379414	265383097	-	18,15,1,4,5,10,3,12,7,11,11,11,11,11,11,11,11		TIR		Yes	jg673924
chr1	chr1_nlr_204	complete (pseudogene)	263690955	263694353	-	18,15,1,4,5,10,3,12,7,11,9,11,9,9,9,11		TIR		Yes	jg673671
chr1	chr1_nlr_205	complete	263624365	263627442	-	15,1,4,5,10,3,12,7,11,11,11,9,9,11,11		TIR
chr1	chr1_nlr_206	partial	262387582	262390492	-	18,13,1,4,5,10,3,12,8,7,20		TIR		Yes	jg673436
chr1	chr1_nlr_207	partial (pseudogene)	262300891	262303515	-	18,15,1,4,5,12,7		TIR
chr1	chr1_nlr_208	complete	253788813	253792125	-	18,15,1,4,5,10,3,12,7,19,11,11,9,11,9,9,11,11,11		TIR
chr1	chr1_nlr_209	partial	253653457	253654579	-	18,15,1,4,5		TIR
chr1	chr1_nlr_21	complete	177738965	177742211	+	18,13,1,4,5,10,3,12,7,11,11,11,11,11,11,9,9,11,11		TIR		Yes	jg657977
chr1	chr1_nlr_210	complete (pseudogene)	250807107	250812095	-	18,15,1,4,5,10,3,7,11,11,11,11,11,11,11,11,11,11,11,11,11,11,11,11,11,11,11,11,11,11,11,11,11,11,11		TIR
chr1	chr1_nlr_211	complete	245730660	245733798	-	15,1,4,5,10,3,12,7,9,11,11,11,9,11,11,11,11,11		TIR		Yes	jg670231
chr1	chr1_nlr_212	complete	245325619	245329001	-	18,13,1,4,5,10,3,12,7,11,9,11,11,11,11,11,11,11		TIR		Yes	jg670180
chr1	chr1_nlr_213	complete	235607523	235610387	-	1,4,10,3,12,7,11,11,11,11,9,11,9,11,9,11,11,11,11,11,11				Yes	jg668616
chr1	chr1_nlr_214	partial (pseudogene)	233544641	233547076	-	18,4,5,10,3,12,7,11,11,9,11,11,11,11,11,9,11,11,11		TIR
chr1	chr1_nlr_215	complete	232996393	232999641	-	18,13,1,4,5,10,3,12,8,7,11,11,11,11,11,9,11,9,11,11		TIR		Yes	jg668110
chr1	chr1_nlr_216	complete	232976844	232980092	-	18,13,1,4,5,10,3,12,8,7,11,11,11,11,11,9,11,9,11,11		TIR		Yes	jg668109
chr1	chr1_nlr_217	complete	231159364	231164308	-	18,15,1,4,5,10,3,12,7,11,11,11,11,9,9,11,11,11,11,11,11		TIR		Yes	jg667680
chr1	chr1_nlr_218	complete (pseudogene)	231056322	231063773	-	18,13,1,4,5,10,3,12,7,11,11,11,9,11,9,11,11,11,11,11,11,11,11,11,11,11,11,11,11,11,11,11,11,11,11,11,11,11,11,11,11,11,11,11,11,11,11,11		TIR		Yes	jg667666
chr1	chr1_nlr_219	complete	216525730	216530038	-	18,15,1,4,5,10,3,12,7,9,11,11,11,11,11,11,11,11,11,11,11,11,11,11,11		TIR		Yes	jg665389
chr1	chr1_nlr_22	complete	177963679	177967076	+	18,13,1,4,5,10,3,12,11,9,11,11,9,9,11		TIR
chr1	chr1_nlr_220	complete	216411712	216417293	-	18,15,1,4,5,10,3,7,9,11,11,11,11,11,11,11,11,11,11,11,11,11,11,11,11,11,11,11,11,11,11,11,11		TIR
chr1	chr1_nlr_221	complete	215997035	216001768	-	18,15,1,4,5,10,3,12,7,11,11,11,11,11,11,11,11,11,11,11,11,11,11,11,11,11,11,11		TIR		Yes	jg665308
chr1	chr1_nlr_222	complete (pseudogene)	213840327	213843024	-	1,4,5,10,3,12,7,11,11,11,11,11,9,11,9,9,11,11
chr1	chr1_nlr_223	complete	213465083	213469997	-	18,13,1,4,10,3,12,7,11,11,11,11,11,11,11,11,11,11,11,11,11,11,11		TIR
chr1	chr1_nlr_224	complete	213217666	213223506	-	18,15,1,4,5,10,3,12,8,7,11,11,11,11,11,11,11,11,11,11,11,11,11,11,11,11,11,11,11,11,11,11,11,11,11,11,11,11,11,11,11,11		TIR		Yes	jg664711
chr1	chr1_nlr_225	partial (pseudogene)	213196991	213198525	-	18,15,1,4,5,10,12,8		TIR
chr1	chr1_nlr_226	complete	211086475	211091107	-	18,15,1,4,5,10,3,12,7,11,11,11,11,11,11,11,11,11,11,11,11,11,11		TIR		Yes	jg664343
chr1	chr1_nlr_227	partial (pseudogene)	210992642	210994571	-	18,15,13,1,4,5,10,3,12,7,20		TIR		Yes	jg664322
chr1	chr1_nlr_228	complete (pseudogene)	210926387	210933756	-	18,15,13,1,4,5,10,3,12,7,11,11,11,11,11,11,11,11,11,11,11,11,11,11,11,11,11,11,11,11,11,11,11,11,11,11,11,11,11,11,11,11,11,11		TIR
chr1	chr1_nlr_229	complete (pseudogene)	210819966	210824737	-	18,15,1,4,5,10,3,7,9,11,11,11,11,11,11,11,11,11,11,11,11		TIR
chr1	chr1_nlr_23	complete (pseudogene)	178849992	178852809	+	18,13,1,4,5,10,3,12,7,11,11,11		TIR
chr1	chr1_nlr_230	complete	210570783	210574193	-	18,15,1,4,5,10,3,12,7,11,11		TIR
chr1	chr1_nlr_231	complete (pseudogene)	210449615	210452624	-	18,15,13,1,4,5,3,12,7,11		TIR
chr1	chr1_nlr_232	partial	210403076	210404693	-	18,15,1,4,5,10,3,12,7		TIR		Yes	jg664226
chr1	chr1_nlr_233	partial (pseudogene)	209396790	209398103	-	18,15,1,4,5,3		TIR
chr1	chr1_nlr_234	complete	209361082	209362692	-	1,4,5,10,3,11,11,11,11,11
chr1	chr1_nlr_235	complete (pseudogene)	209334914	209337605	-	18,15,13,1,4,5,10,3,7,11,11,11,11,9,11		TIR
chr1	chr1_nlr_236	complete (pseudogene)	209311760	209314219	-	18,15,1,4,5,10,3,7,11,11,11		TIR
chr1	chr1_nlr_237	complete	209259688	209262137	-	18,15,1,4,5,10,3,7,11,11		TIR		Yes	jg663985
chr1	chr1_nlr_238	complete (pseudogene)	207716994	207719738	-	18,15,1,4,5,10,3,7,11,11,11,11		TIR
chr1	chr1_nlr_239	complete (pseudogene)	207095378	207098589	-	15,1,4,5,10,2,7,11		TIR
chr1	chr1_nlr_24	complete (pseudogene)	178861658	178864103	+	1,4,5,10,3,12,7,11,11,9,11,9,9,9,11,11,11,11
chr1	chr1_nlr_240	complete	206859648	206863153	-	18,15,1,4,5,3,7,11,11,11,11,11,11,11,11,11,11,11		TIR		Yes	jg663500
chr1	chr1_nlr_241	complete	203960597	203964403	-	18,13,1,4,5,3,12,7,11,11,11,11,9,11,11,11,11		TIR
chr1	chr1_nlr_242	partial	203830581	203832256	-	18,15,1,4,5,10,3,12,7		TIR		Yes	jg662985
chr1	chr1_nlr_243	partial	203226830	203230019	-	18,13,1,4,5,3,12,7		TIR		Yes	jg662842
chr1	chr1_nlr_244	partial	203226830	203228454	-	18,15,1,4,5,3,12,7		TIR		Yes	jg662842
chr1	chr1_nlr_245	complete	202931354	202935272	-	18,15,13,1,4,5,10,3,12,7,11,11,11,11,11,11,9,9,11,11,11,11,11,9,9,11,11		TIR
chr1	chr1_nlr_246	complete (pseudogene)	201897670	201901446	-	18,13,1,4,5,3,12,7,11,11,11,11,11,11,9,11,11,9,9,11,11		TIR
chr1	chr1_nlr_247	complete	201779218	201781970	-	18,15,1,4,5,3,7,9,11,11,11,11		TIR		Yes	jg662585
chr1	chr1_nlr_248	partial	201709328	201710620	-	18,15,1,4,5,3		TIR		Yes	jg662572
chr1	chr1_nlr_249	complete	201301027	201303582	-	18,15,1,4,5,10,3,7,11,11		TIR		Yes	jg662507
chr1	chr1_nlr_25	complete (pseudogene)	180476144	180480917	+	18,13,1,4,5,10,3,12,8,7,11,11,11,11,11,9,11,11		TIR
chr1	chr1_nlr_250	partial	201043457	201050797	-	18,15,1,4,5,10		TIR
chr1	chr1_nlr_251	complete	200957132	200960951	-	18,13,1,4,5,10,3,12,7,11,11,11,11,11,11,9,11,9,9,11,11,11,11,11		TIR		Yes	jg662453
chr1	chr1_nlr_252	complete	197962662	197965984	-	18,15,1,4,5,10,3,7,11,11,11,11,11,11,11,11,11,11,11		TIR		Yes	jg661950
chr1	chr1_nlr_253	complete (pseudogene)	197519657	197523130	-	18,15,1,4,5,10,3,8,11,11		TIR		Yes	jg661865
chr1	chr1_nlr_254	complete (pseudogene)	196902043	196907275	-	18,15,1,4,5,10,3,12,7,11,11,11		TIR
chr1	chr1_nlr_255	complete	196226494	196229609	-	18,13,1,4,5,10,3,12,7,11,11,11,11,11,9,9,11		TIR		Yes	jg661654
chr1	chr1_nlr_256	complete	196139589	196143264	-	18,15,1,4,5,10,3,12,7,11,11,11		TIR
chr1	chr1_nlr_257	complete (pseudogene)	196123863	196129424	-	18,15,1,4,5,10,3,12,7,11,11,11,11		TIR
chr1	chr1_nlr_258	complete	194273804	194276575	-	18,15,1,4,5,10,3,12,7,11,11		TIR		Yes	jg661270
chr1	chr1_nlr_259	complete	193969795	193972587	-	18,15,1,4,5,10,3,12,7,11,11		TIR		Yes	jg661220.1
chr1	chr1_nlr_26	complete (pseudogene)	182408742	182412848	+	18,15,1,4,5,10,3,12,7,9,11,11,11,11,11,11,11,11,11		TIR
chr1	chr1_nlr_260	complete	190342609	190347769	-	1,4,5,10,3,7,11,11,11,11,11,9,11,11,11
chr1	chr1_nlr_261	complete	190011030	190014251	-	18,15,1,4,5,10,3,7,11,11,11,11,11,11,11		TIR		Yes	jg660387
chr1	chr1_nlr_262	complete (pseudogene)	188028031	188030954	-	18,15,1,4,5,10,3,12,7,11,11		TIR		Yes	jg660036
chr1	chr1_nlr_263	complete	186561185	186566910	-	18,15,1,4,5,10,3,12,7,9,11,11,11,11,11,11,11,11,11,11,11,11,11,11,11,11,11,11,11,11,11,11,11,11,11,11,11,11,11		TIR
chr1	chr1_nlr_264	partial	186046693	186048294	-	18,15,1,4,5,10,3,7		TIR		Yes	jg659539
chr1	chr1_nlr_265	complete (pseudogene)	185544577	185548272	-	18,15,1,4,5,10,3,7,9,11,11,11,11,11,11,11,9		TIR
chr1	chr1_nlr_266	partial (pseudogene)	184694837	184698801	-	18,15,4,5,10,3,12,7,11,11,11,11,11,11,11,11,11,11,11,11,11,11,11,11,11,11,11		TIR
chr1	chr1_nlr_267	partial	180595533	180596845	-	18,13,1,4,5,10,3		TIR		Yes	jg658547
chr1	chr1_nlr_268	complete	180251323	180254898	-	18,15,1,4,5,10,3,12,7,11,9,11,11,9,11,9,9,11		TIR		Yes	jg658484
chr1	chr1_nlr_269	complete	180188749	180191239	-	17,1,6,4,5,10,3,12,2,8,7,11,9,9,11,11,11,11	CC
chr1	chr1_nlr_27	complete	182878155	182880391	+	18,15,1,4,5,10,3,7,9		TIR		Yes	jg658940
chr1	chr1_nlr_270	complete	179987649	179990554	-	18,15,1,4,5,10,3,12,7,11,11,11,11,11		TIR		Yes	jg658445.2
chr1	chr1_nlr_271	complete	179949324	179952470	-	18,15,1,4,5,3,7,9,11,11,11,11,11,11		TIR		Yes	jg658441
chr1	chr1_nlr_272	complete (pseudogene)	179937172	179942794	-	18,15,1,4,5,3,12,7,9,11,11		TIR		Yes	jg658441
chr1	chr1_nlr_273	complete (pseudogene)	178780573	178785714	-	18,15,13,1,4,5,10,3,12,7,11,9,11,11,11,11,11,11,11,11,9,11,11,11,20		TIR		Yes	jg658196
chr1	chr1_nlr_274	complete	178454282	178457433	-	18,13,1,4,5,3,12,7,11,11,11,11,11,11,11,9,9		TIR		Yes	jg658134
chr1	chr1_nlr_275	complete (pseudogene)	178329204	178333198	-	18,15,13,1,4,5,10,3,12,7,11,11,11,9,11,11,9,9,11,11		TIR		Yes	jg658106
chr1	chr1_nlr_276	complete	178126779	178130282	-	18,13,1,4,5,10,3,12,7,11,11,11,11,11,11,11,9,9,11,11,11		TIR		Yes	jg658069
chr1	chr1_nlr_277	partial	177821333	177823003	-	1,4,5,10,3,7
chr1	chr1_nlr_278	complete	177392263	177395673	-	18,13,1,4,5,10,3,12,7,11,11,11,11,11,11,9,9,11,11,11		TIR		Yes	jg657906
chr1	chr1_nlr_279	complete	177182368	177185583	-	18,13,1,4,5,10,3,12,7,11,11,11,11,9,11,11,11		TIR		Yes	jg657858
chr1	chr1_nlr_28	complete	183463375	183466833	+	18,15,1,4,5,10,3,7,11,11,11,11,11,11,11,11		TIR		Yes	jg659056
chr1	chr1_nlr_280	complete (pseudogene)	177116768	177120250	-	18,13,1,4,5,10,3,12,7,11,11,11,11,11,11,11,11,9,11,19,11		TIR
chr1	chr1_nlr_281	complete (pseudogene)	177044167	177048443	-	18,13,1,4,5,3,7,11,11,11,11,11,11,9		TIR
chr1	chr1_nlr_282	complete (pseudogene)	176724623	176727979	-	18,13,1,4,5,10,3,12,7,11,11,11,11,11,11,11,9,9,11,11		TIR
chr1	chr1_nlr_283	complete	176664974	176668572	-	18,13,1,4,5,10,3,12,7,11,11,11,9,11,11,9,9,9,11,11,11		TIR		Yes	jg657764
chr1	chr1_nlr_284	complete (pseudogene)	176616050	176619584	-	18,13,1,4,5,10,3,12,7,11,11,11,9,11,11,9,9,11,11,19,11		TIR		Yes	jg657756
chr1	chr1_nlr_285	complete (pseudogene)	176541931	176544774	-	1,4,5,10,3,12,7,11,11,11,9,11,9,11
chr1	chr1_nlr_286	complete (pseudogene)	176454022	176457388	-	18,13,1,4,5,10,3,12,7,9,11,11,11,11,11,9,11,9,11,11,11		TIR		Yes	jg657724
chr1	chr1_nlr_287	complete (pseudogene)	176310161	176313460	-	13,1,4,5,10,3,12,7,11,11,11,9,11,11,11,9,11,11		TIR
chr1	chr1_nlr_288	complete (pseudogene)	176282475	176285307	-	18,13,1,4,5,10,3,9		TIR
chr1	chr1_nlr_289	complete (pseudogene)	176129956	176133464	-	18,13,1,4,5,10,3,12,7,11,11,11,11,11,11,9,9,11,11,19,11		TIR		Yes	jg657670
chr1	chr1_nlr_29	complete	183564270	183567603	+	18,15,13,1,4,5,10,3,12,7,11,11,11,11,11		TIR
chr1	chr1_nlr_290	complete	176005425	176008978	-	18,13,1,4,5,10,3,12,7,11,11,11,11,11,11,9,9,11,11,11		TIR		Yes	jg657647
chr1	chr1_nlr_291	complete	175166285	175169589	-	18,15,1,4,5,10,3,7,11,11,11,11,11,11,11		TIR		Yes	jg657489
chr1	chr1_nlr_292	complete	172927014	172929801	-	18,15,13,1,4,5,10,3,12,7,11,11,11,11		TIR		Yes	jg657032
chr1	chr1_nlr_293	partial (pseudogene)	169419419	169421000	-	18,13,1,4,10,3,12,2		TIR
chr1	chr1_nlr_294	complete	169367117	169370321	-	18,13,1,4,5,10,3,12,7,11,11,11,11,11,9,9,11		TIR		Yes	jg656407
chr1	chr1_nlr_295	complete (pseudogene)	169258424	169264166	-	18,15,1,4,5,10,3,12,7,11,11,11,11,11,11,11,11,11,11,19,11,11,11,11,11,11,11,11,11,11,11,11,11,11,11,11,11,11		TIR
chr1	chr1_nlr_296	complete (pseudogene)	169112097	169114918	-	18,13,1,4,10,3,12,7,11,11,9,11,11,11		TIR
chr1	chr1_nlr_297	complete (pseudogene)	169098015	169101240	-	18,13,1,4,5,10,3,12,7,11,11,9,11,9,11,11,9,19		TIR
chr1	chr1_nlr_298	complete (pseudogene)	165049540	165052017	-	18,15,13,1,4,5,10,3,12,7,11,20		TIR		Yes	jg655607
chr1	chr1_nlr_299	complete (pseudogene)	164662568	164665503	-	18,15,1,4,5,10,3,12,7,11,11,11,11,11		TIR
chr1	chr1_nlr_3	complete	123322682	123325181	+	17,16,1,6,4,5,10,3,12,2,8,7,9,9,9,9,9,9,11,11,11	CC
chr1	chr1_nlr_30	complete	185821301	185824239	+	18,15,1,4,5,10,3,12,7,11,11,11,11		TIR		Yes	jg659500
chr1	chr1_nlr_300	partial (pseudogene)	163791357	163792957	-	18,15,13,1,4,5,10,3,12,7		TIR
chr1	chr1_nlr_301	complete	163607233	163610174	-	18,15,13,1,4,5,10,3,12,7,11,11,11,11		TIR
chr1	chr1_nlr_302	partial	163353952	163357204	-	18,15,13,1,4,5,10		TIR
chr1	chr1_nlr_303	complete (pseudogene)	119859744	119867324	-	17,1,6,4,5,3,12,2,8,7,9,9,9,11,11	CC
chr1	chr1_nlr_304	complete (pseudogene)	119831406	119838986	-	17,1,6,4,5,3,12,2,8,7,9,9,9,11,11	CC
chr1	chr1_nlr_305	complete	119754654	119762059	-	17,16,1,6,4,5,10,3,12,2,8,7,9,9,9,11,11	CC
chr1	chr1_nlr_306	complete (pseudogene)	91972693	91973701	-	13,1,4,5,10,19		TIR
chr1	chr1_nlr_307	complete	91260307	91263621	-	18,13,1,4,5,10,3,12,7,11,11,9,11,9,9,9,9,9,11,9,9,9,11,11		TIR		Yes	jg639855
chr1	chr1_nlr_308	partial (pseudogene)	63128048	63129229	-	18,15,1,4,5,10		TIR
chr1	chr1_nlr_309	complete (pseudogene)	50881906	50886311	-	1,6,5,10,3,12,2,7,9,9,9,19	CC
chr1	chr1_nlr_31	complete (pseudogene)	186141280	186144172	+	18,15,1,4,5,3,12,7,9,11,11,11,11,11,11,11,11		TIR		Yes	jg659558
chr1	chr1_nlr_310	complete (pseudogene)	50872781	50875272	-	17,1,6,4,5,10,3,12,2,7,11,9,9,19,19,11,11,11	CC
chr1	chr1_nlr_32	complete	192718805	192722514	+	18,13,1,4,5,10,3,12,7,11,11,11,11,11,11,9,9,11,9,11,11,11		TIR		Yes	jg660999
chr1	chr1_nlr_33	partial	195544820	195546283	+	18,15,1,4,5,10,3		TIR
chr1	chr1_nlr_34	complete	196328576	196331887	+	18,15,1,4,5,10,3,12,7,11,11,11,11,11,11,11,11,11,11,11		TIR		Yes	jg661667
chr1	chr1_nlr_35	partial	196390241	196397432	+	18,15,1,4,5,3,12,7		TIR
chr1	chr1_nlr_36	complete	197112713	197115466	+	1,4,5,10,3,12,7,11,11,11,11,11,9,9,11,11,11,11,11,11,11,11,11
chr1	chr1_nlr_37	complete	197443500	197447049	+	1,4,10,3,12,7,11,11,11,11,9,11,9,11,11,11,11,11,11,11,11,11,11,11,11,9,11				Yes	jg661859
chr1	chr1_nlr_38	complete	197593790	197596989	+	1,4,5,10,3,12,7,11,11,11,9,11,9,11,11,11,11,11,11,11,11,11,11,11,11
chr1	chr1_nlr_39	partial (pseudogene)	197797675	197798428	+	1,6,4,5,10,3,12,2	CC
chr1	chr1_nlr_4	complete	163281596	163284498	+	18,15,13,1,4,5,10,3,12,7,11,11,11,11,11,11,11		TIR		Yes	jg655294
chr1	chr1_nlr_40	complete (pseudogene)	197817356	197822684	+	1,4,5,10,3,12,7,11,11,11,11,9,11,11,11,11,11,9,11,11,11,11,11,11,9,11,19
chr1	chr1_nlr_41	complete (pseudogene)	197875844	197880533	+	1,4,5,10,3,7,11,11,9,11,9,11,9,11,11,11,9,11,11
chr1	chr1_nlr_42	complete	198038361	198042273	+	1,4,5,10,3,12,7,11,11,11,9,11,9,11,11,11,11,11,11,11,11,11,11,11,11				Yes	jg661959
chr1	chr1_nlr_43	complete	198062064	198065263	+	1,4,5,10,3,12,7,11,11,11,9,11,9,11,11,11,11,11,11,11,11,11,11,11,11
chr1	chr1_nlr_44	partial (pseudogene)	199896337	199897450	+	18,15,1,4,5		TIR
chr1	chr1_nlr_45	complete	204992429	204996714	+	18,13,1,4,5,10,3,12,7,11,11,11,11,11,11,11,11,11,11,11,11,11,11,11,11,11,11,11,11,11,11,11,11,11		TIR		Yes	jg663167
chr1	chr1_nlr_46	complete	205003492	205007777	+	18,13,1,4,5,10,3,12,7,11,11,11,11,11,11,11,11,11,11,11,11,11,11,11,11,11,11,11,11,11,11,11,11,11		TIR
chr1	chr1_nlr_47	complete (pseudogene)	205670163	205673820	+	18,13,1,4,5,10,3,12,11,11,11,11,11,11,9,11,11,11,11		TIR
chr1	chr1_nlr_48	complete (pseudogene)	205751902	205756963	+	18,13,1,4,5,10,3,12,7,11,11,11,11,11,11,11,11,9,11,11,11,11		TIR		Yes	c43043_g4_i1.p1
chr1	chr1_nlr_49	complete	205880729	205884988	+	18,15,1,4,5,10,3,12,11,11,11,11,11,11,11,11,11,11,9,9,11,11,11,11		TIR
chr1	chr1_nlr_5	partial (pseudogene)	163342969	163344583	+	18,15,13,1,4,5,10,3,12,7		TIR
chr1	chr1_nlr_50	complete (pseudogene)	205904429	205909013	+	18,15,1,4,5,10,3,12,7,11,11,11,11,11,9,11,9,11,11,11,11,11,11,11,11,11		TIR
chr1	chr1_nlr_51	complete	206667787	206671640	+	18,15,1,4,5,10,3,12,7,11,11,11,11,11,11,11,11,11,11,11,11,11,11,11,11,11		TIR		Yes	jg663473
chr1	chr1_nlr_52	partial	208060539	208062218	+	18,15,1,4,5,3,12,7		TIR		Yes	jg663745
chr1	chr1_nlr_53	partial	208564086	208565782	+	18,15,1,4,5,10,3,12,7		TIR
chr1	chr1_nlr_54	complete (pseudogene)	208653486	208658881	+	18,15,1,4,5,10,3,7,11,11,11,11,11,11,11,11,11,11,11,9		TIR
chr1	chr1_nlr_55	partial (pseudogene)	209072996	209077845	+	5,10,3,12,11,11,11,11,11,11,11,11,11,11,11,11
chr1	chr1_nlr_56	complete (pseudogene)	210652440	210655677	+	18,15,1,4,5,10,3,12,7,11,11,11,11		TIR
chr1	chr1_nlr_57	complete	213603996	213607500	+	18,15,1,4,5,10,3,7,9,11,11,11,11,11,11,11,11,11,11,11,11,11,11,11,11		TIR		Yes	jg664797
chr1	chr1_nlr_58	complete	214184977	214189302	+	18,15,1,4,5,10,3,12,7,11,11,11,11,11,9,11,11,11,11,11,11,9,11,11,11		TIR		Yes	jg664895
chr1	chr1_nlr_59	complete	216371623	216376047	+	18,15,1,4,5,10,3,7,9,11,11,11,11,11,11,11,11,11,11,11,11,11,11,11		TIR		Yes	jg665366
chr1	chr1_nlr_6	complete (pseudogene)	163711727	163714496	+	18,15,13,1,4,5,10,3,12,7,11,11,11,11		TIR
chr1	chr1_nlr_60	complete (pseudogene)	228478569	228493122	+	18,15,1,4,5,10,3,7,11,11,11,11,11,9,11,9,11,11,11,11,11,11,11,11,11,11,11,11,11,11,11,11,11		TIR
chr1	chr1_nlr_61	partial (pseudogene)	228917210	228917775	+	1,4,5,10,3
chr1	chr1_nlr_62	complete	228934736	228940274	+	15,1,4,5,10,3,12,8,7,11,11,11,11,9,11,9,11,11,11,11,11,11,11,11,11,11,11,11,11,11,11,11,11,11,11,11,11,11,11,11,11,11,11,11,11,11,11,11,11		TIR
chr1	chr1_nlr_63	complete (pseudogene)	229011388	229017634	+	18,13,1,4,5,10,3,12,7,11,11,11,11,11,11,9,9,11,9,11,11,11,11,11,11,11,11,11,11,11,11,11,11,11,11,11,11,11,11,11,11,11		TIR		Yes	jg667380
chr1	chr1_nlr_64	complete (pseudogene)	232936370	232939274	+	13,1,4,5,3,12,7,11,11,11,11,9,11,9,11,9,11		TIR
chr1	chr1_nlr_65	complete (pseudogene)	233203752	233205978	+	18,13,1,4,5,10,3,12,7,11,11,11,9		TIR
chr1	chr1_nlr_66	complete	234213986	234217676	+	18,15,1,4,5,10,3,12,7,11,11,11,9,11,9,11,9,11,11,11,11,11,11		TIR		Yes	jg668377
chr1	chr1_nlr_67	complete (pseudogene)	234572182	234575325	+	1,4,5,10,3,12,7,11,11,11,11,9,11,11,9,11,11,11,11,11,11,11,11
chr1	chr1_nlr_68	complete (pseudogene)	234905516	234909984	+	15,1,4,5,10,3,12,7,9,11,9,11,11,11,11,11,11,11,11,11,11,11,11,11,11,11		TIR
chr1	chr1_nlr_69	complete (pseudogene)	234933584	234938052	+	15,1,4,5,10,3,12,7,9,11,9,11,11,11,11,11,11,11,11,11,11,11,11,11,11,11		TIR
chr1	chr1_nlr_7	complete	164281227	164284284	+	18,15,13,1,4,5,10,3,12,7,11,11,11,11,11,11,11		TIR		Yes	jg655497
chr1	chr1_nlr_70	partial	235124611	235125484	+	1,4,5,10,3,12,7
chr1	chr1_nlr_71	complete	235130322	235133262	+	1,4,5,10,3,12,7,11,11,11,11,9,11,9,11,11,11,11,11,11				Yes	jg668529
chr1	chr1_nlr_72	complete (pseudogene)	235494011	235497296	+	18,15,1,4,5,10,3,7,11,11,11,11,11,9,9,11,9,11,11		TIR		Yes	jg668584
chr1	chr1_nlr_73	complete	235657355	235659211	+	1,4,5,10,3,12,7,11,11,11,11,11,11,11				Yes	jg668621
chr1	chr1_nlr_74	complete (pseudogene)	244360150	244365257	+	18,15,1,4,5,10,3,12,7,11,19,9,11,11,11,11,11,11,11,11,11,11,11,11,11,11,11,11,11,11,11,11,11,11,11,9,11,11,11,11,11		TIR		Yes	jg670019
chr1	chr1_nlr_75	complete (pseudogene)	244792544	244796275	+	18,15,1,4,5,10,3,12,7,11,11,11,11,11,11,11,11,11,11,11,11,11,9,11,19,11		TIR		Yes	jg670083
chr1	chr1_nlr_76	complete (pseudogene)	244827823	244830815	+	1,4,5,10,3,12,7,11,11,11,11,11,11,11,11,11,11,11,11,11,9,11,19,11
chr1	chr1_nlr_77	complete	245132506	245136447	+	18,13,1,4,5,10,3,12,7,11,11,11,11,11,11,11,11,11,11,11,9		TIR		Yes	jg670144
chr1	chr1_nlr_78	complete (pseudogene)	247082568	247085669	+	18,15,1,4,5,10,3,12,7,11,11,11,11,9,11,11,11,11,11,11,9		TIR		Yes	jg670395
chr1	chr1_nlr_79	complete (pseudogene)	247195809	247198784	+	18,13,1,4,5,10,3,12,7,11,11,9,11,11,11,11,11		TIR
chr1	chr1_nlr_8	complete (pseudogene)	165153299	165155775	+	18,15,13,1,4,5,10,3,7,11,20		TIR
chr1	chr1_nlr_80	complete (pseudogene)	247778095	247781026	+	18,15,1,4,5,19		TIR		Yes	jg670562
chr1	chr1_nlr_81	complete (pseudogene)	247814909	247817817	+	1,4,5,10,3,12,7,11,11,11,11,9,11,9,11,11,11,11,11,11,11
chr1	chr1_nlr_82	partial (pseudogene)	259250862	259253080	+	18,15,1,4,5,12,7		TIR
chr1	chr1_nlr_83	complete	259272605	259275878	+	1,4,5,10,3,12,7,11,11,11,11,11,9,19,9,11,11,11,11,11,11,11,11,11,11,11,11,11,11,11				Yes	jg672797
chr1	chr1_nlr_84	partial	266628607	266630288	+	18,15,1,4,5,10,3,12,7		TIR
chr1	chr1_nlr_85	complete	266957755	266963285	+	18,15,1,4,5,10,3,12,7,11,11,11,11,11,11,11,11,11,11,11,11,11,11,11,11,11,11,11,11,11,11,11,11,11,11,11,11,11,11,11		TIR		Yes	jg674198
chr1	chr1_nlr_86	complete (pseudogene)	267025882	267029500	+	1,5,10,3,12,7,9,11,11,11,11,11
chr1	chr1_nlr_87	complete	271550740	271552593	+	1,4,5,10,3,11,11,11,11,9,11,11
chr1	chr1_nlr_88	complete	271702186	271705181	+	18,15,1,4,5,10,3,11,11,11,11,9,11		TIR		Yes	jg674887
chr1	chr1_nlr_89	complete	272429350	272432371	+	18,15,1,4,5,10,3,11,11,11,11,11,9		TIR		Yes	jg675004
chr1	chr1_nlr_9	complete	165522138	165525071	+	18,15,1,4,5,10,3,12,7,11,11,11,11,11,11,11		TIR
chr1	chr1_nlr_90	partial	272831265	272832574	+	4,5,10,3,11,11,11
chr1	chr1_nlr_91	complete	272843659	272845983	+	18,15,1,4,5,10,3,11,11,11,11,9,9,11		TIR
chr1	chr1_nlr_92	complete	272975919	272978927	+	18,15,1,4,5,10,3,11,11,11,11,11,9,11		TIR		Yes	jg675085
chr1	chr1_nlr_93	complete	273117237	273118882	+	1,4,5,10,3,2,11,11,11,11,9,11	CC			Yes	jg675105
chr1	chr1_nlr_94	complete	273577751	273581338	+	18,15,1,4,5,10,3,12,7,11,11,11,9,11,9,11,11,11,11,11		TIR
chr1	chr1_nlr_95	complete (pseudogene)	273872592	273875564	+	18,15,1,4,5,10,3,12,7,11,11,11,11,9,11,11,11,11,11,9		TIR		Yes	jg675241
chr1	chr1_nlr_96	complete (pseudogene)	298020779	298023546	+	18,15,13,1,4,5,10,3,7,11,11		TIR		Yes	jg679034
chr1	chr1_nlr_97	complete	313077729	313081562	+	18,15,1,4,10,3,12,7,11,11,11,11,11,9,11,9,11,11,11,11		TIR
chr1	chr1_nlr_98	complete (pseudogene)	313299178	313303104	+	18,15,1,4,5,10,3,12,8,7,11,11,11,11,11,11,9,11,11,11,11,11,11,11		TIR
chr1	chr1_nlr_99	complete (pseudogene)	313405197	313409902	+	18,15,1,4,5,10,3,12,7,11,11,11,11,11,9,11,9,9,11,11,11,11,11,11		TIR		Yes	jg681374
chr10	chr10_nlr_1	complete	42919794	42922845	+	13,1,4,5,10,3,12,7,11,11,11,11,11,11		TIR		Yes	jg833685
chr10	chr10_nlr_10	complete (pseudogene)	538212071	538216171	-	18,15,1,4,5,3,12,7,9,11,11,11,11,19,11,11,11,11,11,11,11,11,11,11,11		TIR		Yes	jg923706.2
chr10	chr10_nlr_11	complete (pseudogene)	521051590	521057894	-	18,15,13,1,4,5,10,3,12,7,11,11,11,11,11,11,11,9		TIR
chr10	chr10_nlr_12	complete	520924886	520927779	-	18,15,1,4,5,10,3,7,9,11,11		TIR
chr10	chr10_nlr_13	complete (pseudogene)	520805842	520810952	-	18,15,1,4,5,10,3,12,7,9,11,11,20		TIR
chr10	chr10_nlr_14	complete	485217213	485219762	-	17,16,1,6,4,5,10,3,12,2,8,7,9,9,11,11,11,11	CC
chr10	chr10_nlr_15	partial (pseudogene)	462504148	462504834	-	2,8,7
chr10	chr10_nlr_16	complete (pseudogene)	455256502	455260430	-	18,15,13,1,4,5,10,3,12,7,11,11,11,11,11,11,11,11,11,11,11,11,11,11,11,11,11		TIR
chr10	chr10_nlr_17	complete (pseudogene)	447213132	447218608	-	1,4,5,10,3,12,7,11,9,11,11,11,11,11,11
chr10	chr10_nlr_18	complete	447115401	447117801	-	1,4,5,10,3,7,11,11,11,11,11,11,11,11,11,11,11,11,11,11,11,11
chr10	chr10_nlr_19	complete (pseudogene)	446947004	446951996	-	18,15,1,4,5,3,7,11,11,11,11,11,11		TIR
chr10	chr10_nlr_2	complete	91300809	91303362	+	17,16,1,6,4,10,3,12,2,7,9,9,9,11,11,11,11	CC
chr10	chr10_nlr_20	complete	429282902	429287124	-	18,15,1,4,5,10,3,12,7,11,11,11,11,11,11,11,11,11,11,11,11,11,11,11,11,11,11,11,11,11,11,11,11		TIR		Yes	jg904214
chr10	chr10_nlr_21	complete	418397298	418400062	-	1,4,5,10,3,2,8,7,11,11,11,11,11	CC		RNL	Yes	jg902169
chr10	chr10_nlr_22	complete	413796447	413803816	-	18,13,1,4,5,10,3,12,7,11,11,11,11,11,11,9,11,11,11,11,11,11,9		TIR
chr10	chr10_nlr_23	complete (pseudogene)	413067592	413071833	-	18,15,1,4,5,10,3,7,9,11,11,11,11,11,11,11,11,11,11,11,11,11,11,11,11,11,11		TIR
chr10	chr10_nlr_24	complete	413029002	413032397	-	18,15,1,4,5,3,12,7,11,11,11,11,11,11		TIR		Yes	jg901074
chr10	chr10_nlr_25	partial	364316375	364317030	-	1,4,10,3,12
chr10	chr10_nlr_26	complete (pseudogene)	268646630	268653250	-	18,15,1,4,5,10,3,7,11,11,11,11,11,11,11,11,11,11,11,11,11,11,11,11,11,11,11,11,11,11,11,11,11,11,11,11,9		TIR
chr10	chr10_nlr_27	complete (pseudogene)	255678882	255680913	-	1,6,4,5,10,3,2,8,7,11,9,9,9,11,9,9,11,11,11	CC			Yes	jg871442
chr10	chr10_nlr_28	complete (pseudogene)	69219170	69228913	-	18,15,1,6,4,5,10,3,12,2,8,7,9,9,9,11		TIR
chr10	chr10_nlr_29	complete	66322951	66325594	-	17,16,1,6,4,5,10,3,12,2,8,7,9,9,9,11,11,11	CC
chr10	chr10_nlr_3	complete	421912906	421915893	+	1,5,10,3,9,11,11,11,11,11,11
chr10	chr10_nlr_30	partial	42853951	42855443	-	18,13,1,4,5,10,3,12		TIR
chr10	chr10_nlr_4	complete	456516256	456519369	+	18,15,13,1,4,10,3,12,7,11,11,11,11,11,11		TIR		Yes	jg909069
chr10	chr10_nlr_5	complete	456754236	456756934	+	18,15,1,4,5,10,3,12,7,11		TIR		Yes	jg909102
chr10	chr10_nlr_6	partial (pseudogene)	476916363	476919141	+	2,8,7,11
chr10	chr10_nlr_7	complete (pseudogene)	585599073	585602048	+	18,13,1,4,5,10,3,12,7,11,11,11,11,11,11,11,11,11,11,11,11,11		TIR
chr10	chr10_nlr_8	partial (pseudogene)	591639161	591642047	-	12,2,8,9,19	CC
chr10	chr10_nlr_9	complete (pseudogene)	543475901	543478854	-	18,15,1,4,5,10,3,12,7,11,11,11		TIR
chr11	chr11_nlr_1	partial (pseudogene)	12956774	12957589	+	1,4,5,12
chr11	chr11_nlr_10	complete (pseudogene)	240541479	240543773	+	1,4,5,3,12,7,11,11,11,11,11
chr11	chr11_nlr_11	partial	244094522	244096893	+	4,5,10,3,2,7,11,11,11,11,11,11	CC			Yes	c28992_g1_i1.p1
chr11	chr11_nlr_12	complete	260728452	260730939	+	1,4,5,10,3,12,7,11,11,11,11,11,11,11,11,11,11,11,11,11,11,11,11
chr11	chr11_nlr_13	complete (pseudogene)	271658482	271661121	+	1,4,5,10,3,12,7,11,11,11,11,11,11,11,11,9
chr11	chr11_nlr_14	complete (pseudogene)	271719000	271721818	+	1,4,5,10,3,12,7,11,11,11,11,11,11,11,11,11,9
chr11	chr11_nlr_15	complete (pseudogene)	271743223	271746260	+	1,4,10,3,12,7,11,11,11,11,11,11,11,11,11,11,11,11,11,11,9
chr11	chr11_nlr_16	complete (pseudogene)	271771112	271773927	+	1,4,5,10,3,12,7,11,11,11,11,11,11,11,11,11,9
chr11	chr11_nlr_17	partial	282861287	282867320	+	18,13,4,5,10,3,12,7,11,11,11,11,11,11,11,11,11,11,11,11,11,11		TIR
chr11	chr11_nlr_18	complete (pseudogene)	283187535	283191672	+	1,4,5,10,3,12,7,11,11,11,11,11,11,11,11,11,11,11,11,11,11,11,11,11,11,11,11,11,11,19,11
chr11	chr11_nlr_19	complete	283290463	283294459	+	18,13,1,4,5,10,3,12,7,11,11,11,11,11,11,11,11,11,11,11,11,11,11,11,11,11,11,11,11,11		TIR		Yes	jg311256
chr11	chr11_nlr_2	complete	46200143	46202645	+	17,16,1,6,4,5,10,3,12,2,7,9,9,11,11,11	CC
chr11	chr11_nlr_20	partial	293155881	293156289	+	1,4,5				Yes	c20269_g1_i1.p1
chr11	chr11_nlr_21	partial (pseudogene)	328975259	328977285	+	1,4,5,10,3,7
chr11	chr11_nlr_22	complete	329741385	329745246	+	18,13,1,4,5,10,3,12,7,11,11,11,11,11,11,11,9,9,11,9,9,11,11,11		TIR		Yes	jg318918
chr11	chr11_nlr_23	complete	440745448	440748510	-	18,13,1,4,5,10,3,12,7,9,11,11,11,11,11		TIR
chr11	chr11_nlr_24	complete (pseudogene)	371725634	371728529	-	1,4,5,10,3,2,7,11,19,11	CC		RNL	Yes	jg326434
chr11	chr11_nlr_25	complete	371027785	371030314	-	1,6,4,10,3,2,7,11,11	CC		RNL	Yes	jg326329
chr11	chr11_nlr_26	partial	329614048	329615337	-	18,15,1,4,5,10,3		TIR		Yes	jg318898
chr11	chr11_nlr_27	partial	329017303	329018587	-	18,13,1,4,5,10,3		TIR		Yes	jg318820
chr11	chr11_nlr_28	complete (pseudogene)	329009163	329013157	-	1,5,10,3,11,9
chr11	chr11_nlr_29	complete (pseudogene)	328881340	328885211	-	18,13,1,4,5,10,3,12,7,11,11,11,11,11,11,11,9,9,9,9,11,11		TIR
chr11	chr11_nlr_3	partial (pseudogene)	56668401	56671298	+	18,15,1,4,5,10,3,12,8,7,20		TIR
chr11	chr11_nlr_30	complete (pseudogene)	328856903	328860188	-	18,15,1,4,5,10,3,11		TIR
chr11	chr11_nlr_31	partial	328852334	328852822	-	5,10,3,11
chr11	chr11_nlr_32	partial (pseudogene)	224624327	224625176	-	1,4,5,10,3,12,7
chr11	chr11_nlr_33	complete	127554071	127556153	-	1,6,4,10,3,12,2,7,9,9,11,11,9,11,9,11,11	CC
chr11	chr11_nlr_34	complete	127479029	127481693	-	17,1,6,4,5,10,3,12,2,8,7,9,9,11,11,9,11,11,11,11	CC			Yes	jg281661
chr11	chr11_nlr_35	complete (pseudogene)	107170359	107174605	-	1,4,5,3,12,7,11,11,11,11,11,11,11,11,11,11,11,11,11,11,11,11,9,9
chr11	chr11_nlr_36	complete (pseudogene)	107114700	107115903	-	1,4,5,3,12,9,11
chr11	chr11_nlr_37	complete	106801766	106808148	-	18,15,1,4,5,10,3,12,7,9,11,11,11,11,11,11,9		TIR
chr11	chr11_nlr_38	complete (pseudogene)	94885119	94889115	-	15,1,4,5,3,7,11,11,11,11,11,11,11,11,11,11,11,11,11,11,11,11,11,11,11		TIR
chr11	chr11_nlr_39	complete	62223212	62228641	-	18,15,1,4,5,10,3,7,9,11,11,11,11,11,11,11,11,11,11,11,11,11,11,11,11,11,11,11,11,11,11,11,11,11,11,11,11,11		TIR
chr11	chr11_nlr_4	complete (pseudogene)	86036736	86041031	+	16,1,6,4,10,2,7,9,11,11	CC
chr11	chr11_nlr_5	complete (pseudogene)	86122910	86124866	+	1,6,4,10,12,2,7,9,11,11	CC
chr11	chr11_nlr_6	complete (pseudogene)	110026327	110030164	+	18,15,1,6,4,5,10,3,12,7,11,11,11,11,11,11,11,11,11,11,11,19		TIR
chr11	chr11_nlr_7	complete (pseudogene)	234760400	234764386	+	18,13,1,4,5,10,3,12,7,11,11,9,11,11,11,11,11,11,11,11,11,9,11,11,19,11,11,11,11		TIR
chr11	chr11_nlr_8	complete (pseudogene)	234808349	234813088	+	18,13,1,4,5,10,3,12,7,11,11,9,11,11,11,11,11,11,11,11,11,9,11,11,19,11,11,11,11,9		TIR
chr11	chr11_nlr_9	complete (pseudogene)	234885065	234889102	+	18,13,1,4,5,10,3,12,7,11,11,11,11,11,11,11,11,11,11,11,11,11,9,11,11,11,11,11,11		TIR
chr2	chr2_nlr_1	complete	18613950	18621247	+	18,13,1,4,5,10,3,12,7,11,11,11,11,9,11,9,11,11,9,9,11,11,11,11,11		TIR		Yes	c41072_g1_i4.p1
chr2	chr2_nlr_10	complete	176089054	176093057	+	1,4,5,10,3,12,7,11,11,11,11,11,11,11,11,11,11
chr2	chr2_nlr_11	complete (pseudogene)	176487480	176492327	+	1,4,5,10,3,12,7,11,11,11,11,11,11,11,11,11,11,11,11,11,11,11,9,11
chr2	chr2_nlr_12	complete	177770602	177773379	+	1,6,4,5,3,12,7,11,11,11,11,11,11,11,11,11,11,11,11,11,11,11,11,11,11,11,11,11,11	CC			Yes	jg495076
chr2	chr2_nlr_13	partial (pseudogene)	240766478	240767340	+	13,5,10,3		TIR
chr2	chr2_nlr_14	complete	565164336	565167561	+	18,15,1,4,5,10,3,7,11,11		TIR		Yes	jg563832
chr2	chr2_nlr_15	partial	583173024	583174863	+	1,6,4,5,10,3,2,7	CC
chr2	chr2_nlr_16	complete	647619062	647620949	+	1,5,10,3,11,11,11,11
chr2	chr2_nlr_17	complete (pseudogene)	649120106	649125494	+	18,15,1,4,5,10,3,12,7,11,11,11,11,11,9,11,9,11,11,11,11,11,11		TIR		Yes	jg578073
chr2	chr2_nlr_18	complete (pseudogene)	672087075	672089089	+	16,1,4,5,10,12,2,7,11,11	CC
chr2	chr2_nlr_19	complete	674465615	674470674	+	18,13,1,4,5,10,3,7,11,11,11,11,11,9,11,9,11,11,11		TIR		Yes	jg582445
chr2	chr2_nlr_2	complete	18652636	18657351	+	1,4,5,10,3,12,7,11,11,11,11,9,11,9,11,11,9,11,11,11,11,11				Yes	jg467547
chr2	chr2_nlr_20	complete	674806707	674812451	+	18,15,1,4,5,10,3,12,7,11,11,11,11,9,11,9,11,11,11,11,11,11,11,11,11,11,11,11,11,11,11,11		TIR		Yes	jg582493
chr2	chr2_nlr_21	complete	674889042	674894511	+	18,13,1,4,5,10,3,12,7,11,11,11,11,9,11,9,11,11,11,11,11,11,11,11,11,11,11,11		TIR		Yes	jg582503
chr2	chr2_nlr_22	complete	708554734	708558978	+	18,15,1,4,5,10,12,11,11,11,11,9,11,9,11,11,11,11,11,11		TIR
chr2	chr2_nlr_23	complete	708571903	708576147	+	18,15,1,4,5,10,12,11,11,11,11,9,11,9,11,11,11,11,11,11		TIR
chr2	chr2_nlr_24	partial	784483941	784484657	+	1,4,12,2,8,7	CC
chr2	chr2_nlr_25	complete (pseudogene)	815973641	815975358	+	1,6,4,5,10,7,11	CC
chr2	chr2_nlr_26	complete (pseudogene)	838055015	838058185	+	1,5,10,3,7,11,11,11,11,11,11,11,11
chr2	chr2_nlr_27	partial (pseudogene)	849174114	849176048	+	18,15,1,4,5,10,3,7,20		TIR		Yes	jg615165
chr2	chr2_nlr_28	complete (pseudogene)	850431184	850433717	+	17,16,1,6,4,5,10,3,12,2,7,9,9,11,11,11,11,11	CC
chr2	chr2_nlr_29	complete (pseudogene)	850455785	850458705	+	16,1,6,4,5,10,3,12,2,8,7,11,9,9,11,11,11,11,11,9	CC
chr2	chr2_nlr_3	complete (pseudogene)	90493612	90495305	+	1,5,10,3,12,7,11,11,11,11,11,11,11,11,11
chr2	chr2_nlr_30	partial (pseudogene)	860021902	860023234	+	4,5,10,3,12,7,11,11,11,11,11,11
chr2	chr2_nlr_31	complete	850275282	850278099	-	18,15,1,6,4,5,10,3,12,2,7,11,9,9,11,11,11		TIR		Yes	jg615401
chr2	chr2_nlr_32	complete	817578625	817580603	-	1,4,5,10,3,12,7,11,11,11,11,11,11,11,11,11,11,11				Yes	jg608864
chr2	chr2_nlr_33	partial	747645411	747646031	-	4,5,10,3,12
chr2	chr2_nlr_34	partial (pseudogene)	706808122	706808494	-	1,6,4,5	CC
chr2	chr2_nlr_35	complete	677173820	677176143	-	16,1,4,5,10,3,12,2,7,9,9,9,9,11,11,11	CC
chr2	chr2_nlr_36	complete	673830548	673836447	-	18,15,1,4,5,10,3,12,7,11,11,11,11,11,9,11,9,11,11,11,11,11,11,11,11,11,11,11,11,11,11,11,11,11		TIR
chr2	chr2_nlr_37	complete (pseudogene)	657125333	657131771	-	18,15,1,4,5,10,3,12,7,11,11,11,11,11,9,11,9,11,11,11,11,11,11,11,11,19		TIR
chr2	chr2_nlr_38	complete (pseudogene)	655266899	655271859	-	18,13,1,4,5,10,3,12,7,11,11,11,11,11,11,11,9,11,9,11,11,11,11,11,11,11,11,11		TIR
chr2	chr2_nlr_39	complete	655206630	655211110	-	18,15,1,4,5,10,3,12,7,11,11,9,11,11,11,11,9,11,9,11,11,11,11		TIR		Yes	jg579148
chr2	chr2_nlr_4	complete	90583166	90585254	+	1,4,5,10,3,12,7,11,11,11,11,11,11,11,11,11,11,11				Yes	jg480476
chr2	chr2_nlr_40	complete (pseudogene)	654900745	654903934	-	18,15,1,4,5,10,3,7,11,11,11,11,11,11,11		TIR
chr2	chr2_nlr_41	partial (pseudogene)	431970555	431972046	-	17,1,4,5,10	CC
chr2	chr2_nlr_42	partial (pseudogene)	252007989	252008823	-	12,2,8	CC
chr2	chr2_nlr_43	partial (pseudogene)	233710188	233710380	-	4,5,10
chr2	chr2_nlr_44	complete (pseudogene)	220059104	220061674	-	17,16,1,6,4,5,10,3,12,2,7,11,9,11,11,11,11,11	CC			Yes	jg502533
chr2	chr2_nlr_45	complete (pseudogene)	213687426	213690251	-	18,15,1,4,5,10,9		TIR
chr2	chr2_nlr_46	complete (pseudogene)	182499752	182505315	-	18,15,1,6,5,10,3,7,11,11,11,11,11,11,11,11,11,9		TIR
chr2	chr2_nlr_47	partial (pseudogene)	182457935	182459785	-	4,5,10,3,12,7,11,11,11,11,11,11,11,11,11,11,9,11,11
chr2	chr2_nlr_48	complete	176268312	176270359	-	1,4,5,10,3,7,11,11,11,11,11,11,11,11,11
chr2	chr2_nlr_49	complete	176233403	176235450	-	1,4,5,10,3,7,11,11,11,11,11,11,11,11,11
chr2	chr2_nlr_5	complete (pseudogene)	90944956	90948964	+	1,4,5,10,3,12,7,11,11,11,11,11,11,11,11,11,11,11,11,11,9,11,9
chr2	chr2_nlr_50	partial	167493655	167494222	-	1,4,5,10,3
chr2	chr2_nlr_51	complete	166772545	166775023	-	1,4,5,10,3,12,7,11,11,11,11,11,11,11,11,11,11,11,11,11,11,11,11,11				Yes	jg493379
chr2	chr2_nlr_52	complete	166034609	166037441	-	1,4,5,10,3,12,7,11,11,11,11,11,11,11,11,11,11,11,11,11,11,9,11,11,11,11,11,11,11,11				Yes	jg493217
chr2	chr2_nlr_53	complete	165274872	165277395	-	1,4,5,10,3,12,7,11,11,11,11,11,11,11,11,11,11,11,11,9,11,11,11,11,11,11
chr2	chr2_nlr_54	complete	162483020	162484643	-	1,4,5,10,3,12,7,9,9,11,11,11,11				Yes	jg492587
chr2	chr2_nlr_55	complete	162471190	162473382	-	1,4,5,10,3,12,7,9,9,11,11,11,11,11,11,9,11
chr2	chr2_nlr_56	complete (pseudogene)	160661514	160663745	-	1,4,5,3,11,11,11,11,11,11,11,11,11,11,11,11,11,11
chr2	chr2_nlr_57	partial (pseudogene)	160499195	160500742	-	1,4,5,10,3,7
chr2	chr2_nlr_58	complete	151121776	151123611	-	1,4,5,10,3,12,7,11,11,11,11,11,11,11,9
chr2	chr2_nlr_59	complete (pseudogene)	150702181	150705852	-	1,4,5,10,7,11,11,11,11,11,11,9,11,11,11,11,11,11,11,11,11,11,11,11,9,11
chr2	chr2_nlr_6	complete (pseudogene)	164871312	164874344	+	1,4,5,10,3,12,7,11,11,11,11,11,11,11,9,11,11,11,11,11,11,11,11,11,11,11,11,11,11,11
chr2	chr2_nlr_60	partial (pseudogene)	121086530	121087543	-	1,6,4,5,10,2	CC			Yes	jg485651
chr2	chr2_nlr_61	complete (pseudogene)	121058089	121061344	-	1,6,4,5,10,3,12,2,19	CC			Yes	jg485647
chr2	chr2_nlr_62	complete (pseudogene)	93616390	93619584	-	18,13,1,4,5,10,3,12,7,11,11,11,11,11,11		TIR
chr2	chr2_nlr_63	complete (pseudogene)	63878044	63883548	-	1,4,5,10,3,12,11,11,11,11,11,11,11,11,11,11,11,11,11,11,11,11,11,11,11,11,11,11,11,19
chr2	chr2_nlr_64	complete	63736752	63739237	-	17,1,6,4,5,10,3,12,2,8,7,11,11,9,9,11,11,11,11	CC
chr2	chr2_nlr_7	complete	175840360	175845584	+	18,15,1,4,5,10,3,12,7,11,11,11,11,11,11,11,11,11,11,11,11,11,11,11,11		TIR		Yes	jg494776
chr2	chr2_nlr_8	complete (pseudogene)	176014605	176016990	+	1,4,5,10,3,12,7,11,11,11,11,11,11,11,11,11,11,11,11,11
chr2	chr2_nlr_9	partial (pseudogene)	176036730	176040158	+	18,15,1,4,5,3		TIR
chr3	chr3_nlr_1	partial	7642759	7644911	+	18,15,1,4,5,10,3,12,7		TIR		Yes	jg1298450
chr3	chr3_nlr_10	complete (pseudogene)	371438199	371440272	+	1,4,10,3,12,7,11,11,11,11,11
chr3	chr3_nlr_11	complete (pseudogene)	371666439	371668500	+	1,4,5,10,3,12,7,11,11,11,11				Yes	jg1362734
chr3	chr3_nlr_12	complete (pseudogene)	371830436	371832777	+	1,4,5,10,3,12,7,11,11,11,11,11,11,11,11,11,11
chr3	chr3_nlr_13	complete (pseudogene)	376945324	376948636	+	1,4,10,3,12,7,11,11,11,11,11,11,11,11,11,19
chr3	chr3_nlr_14	complete (pseudogene)	399790055	399798311	+	18,15,1,4,5,10,3,12,7,11,11,11,11,9,9,11		TIR
chr3	chr3_nlr_15	complete (pseudogene)	399808928	399814398	+	18,15,1,4,5,10,3,12,7,11,11,11,11,11,9,9,11		TIR
chr3	chr3_nlr_16	complete (pseudogene)	399845093	399854324	+	18,15,13,1,4,5,10,3,7,9,11,11,11		TIR
chr3	chr3_nlr_17	complete (pseudogene)	426509221	426514086	+	18,15,1,4,5,10,3,12,7,11,11,11,9,11,9,11,11,11,11,11,11,11		TIR		Yes	jg1371901
chr3	chr3_nlr_18	partial	523242436	523243874	+	1,4,5,10,3
chr3	chr3_nlr_19	complete	609680847	609684734	+	18,15,1,4,5,10,3,12,7,9,11,11,9,11,11,9,11,11,9,11,11,9,11,11,9,11,11,9,11,11,11,11,11		TIR
chr3	chr3_nlr_2	partial (pseudogene)	7894950	7897003	+	18,13,1,4,5,10,3,7		TIR
chr3	chr3_nlr_20	complete	609713670	609716706	+	18,15,1,4,5,10,3,12,7,9,11,11,9,11,11,9,11,11,9,11,11		TIR
chr3	chr3_nlr_21	complete (pseudogene)	609783982	609788210	+	18,15,1,4,5,10,3,12,7,9,11,11,9,11,11,9,11,11,11,9,11,9,11,11,9,11,11,9,11		TIR
chr3	chr3_nlr_22	complete	609812482	609815518	+	18,15,1,4,5,10,3,12,7,9,11,11,9,11,11,9,11,11,9,11,11		TIR		Yes	jg1405617
chr3	chr3_nlr_23	complete	609926022	609929068	+	18,15,1,4,5,10,3,12,7,9,11,11,9,11,11,9,11,11,9,11,11		TIR		Yes	jg1405644
chr3	chr3_nlr_24	complete (pseudogene)	610201941	610209571	+	18,15,1,4,5,10,3,12,7,9,11,11,9,11,11,9,11,9,19		TIR
chr3	chr3_nlr_25	complete (pseudogene)	649853664	649858482	+	18,13,1,4,5,3,12,7,9,11,9,11,9,11,11,11,9		TIR
chr3	chr3_nlr_26	complete	661660809	661662778	+	18,15,1,4,5,10,3,9		TIR
chr3	chr3_nlr_27	complete	677858255	677861400	+	18,13,1,4,5,10,7,11,11,9,11,11,9,11,9,11,11		TIR
chr3	chr3_nlr_28	complete (pseudogene)	677944784	677949181	+	1,4,5,10,3,12,7,11,11,11,11,11,9,11
chr3	chr3_nlr_29	complete (pseudogene)	678094582	678097734	+	18,13,1,4,5,10,3,12,7,11,11,9,9,11,11,9,11,11		TIR
chr3	chr3_nlr_3	partial	8209387	8210020	+	4,5,10,3,7				Yes	jg1298518
chr3	chr3_nlr_30	complete (pseudogene)	685070640	685073442	+	18,15,1,6,4,5,10,3,12,2,7,11,9,9,19,11,11		TIR
chr3	chr3_nlr_31	complete	694515599	694518879	+	1,4,5,10,3,7,11,11,9,11,11,9,11,11,11,11,11,11				Yes	jg1419927
chr3	chr3_nlr_32	complete (pseudogene)	696537579	696540882	+	18,15,1,4,5,10,3,12,7,11,11,11,11,11,11,11,9,9,9,11,11		TIR
chr3	chr3_nlr_33	complete	696775174	696778357	+	18,15,1,4,5,10,3,12,7,11,11,9,11,11,11,11,9,9,11,11		TIR		Yes	jg1420331
chr3	chr3_nlr_34	complete	726608872	726611413	+	17,16,1,6,4,5,10,3,12,2,7,9,9,11,11,11	CC
chr3	chr3_nlr_35	partial	726826728	726829446	+	17,1,4,5,10,3,12,7	CC
chr3	chr3_nlr_36	partial	726875464	726877972	+	17,1,4,5,10,3,12,7	CC
chr3	chr3_nlr_37	complete (pseudogene)	771531037	771533149	+	18,15,1,6,4,5,10,3,12,2,7,9,9		TIR
chr3	chr3_nlr_38	complete (pseudogene)	771590696	771593541	+	18,15,14,1,6,4,5,10,3,12,2,7,11,9,9,9,11,11,11		TIR
chr3	chr3_nlr_39	complete	774948541	774951963	+	18,15,1,6,4,5,10,3,12,2,7,11,9,9,11,11,11,9		TIR
chr3	chr3_nlr_4	complete	59021769	59025757	+	18,13,1,4,5,10,3,12,7,11,11,9,11,11,11,11		TIR		Yes	jg1309482
chr3	chr3_nlr_40	complete (pseudogene)	829479675	829487010	-	18,15,1,4,5,10,3,12,7,11,11,11,11,11,11,11,11,11,11,11,11,11,11,11,11,11,11,11,11,11,11,11,11,11,11,11,11,11,11,11,11,11,11,11,11,11,9		TIR
chr3	chr3_nlr_41	complete (pseudogene)	823779110	823784131	-	18,15,1,4,5,10,3,7,9,11,9,11,11		TIR
chr3	chr3_nlr_42	complete (pseudogene)	773609923	773612806	-	18,15,14,1,6,4,10,3,12,2,7,11,9,9,19,11,11,11		TIR		Yes	jg1433513
chr3	chr3_nlr_43	complete	707033283	707036069	-	18,15,1,6,4,5,10,3,12,2,7,9,9,11,11,11		TIR
chr3	chr3_nlr_44	complete (pseudogene)	694183954	694185740	-	1,4,5,3,12,7,11,9,11,9,11
chr3	chr3_nlr_45	partial	688751868	688753473	-	18,13,1,4,5,3,12,7		TIR		Yes	jg1419002
chr3	chr3_nlr_46	complete	654293551	654296798	-	18,15,1,4,5,10,3,12,7,11,11,9,11,11,11,11,9,9,9,11,11		TIR		Yes	jg1413435
chr3	chr3_nlr_47	complete (pseudogene)	648933980	648935045	-	15,13,1,4,5,10,19		TIR
chr3	chr3_nlr_48	complete (pseudogene)	648193847	648198645	-	18,15,1,4,5,10,3,12,7,9,11,11,11,11,11,11,11,11,11,11,9,19		TIR
chr3	chr3_nlr_49	complete	635748474	635750532	-	1,6,4,10,3,12,2,8,7,11,9,9,9,11,11,11,11	CC			Yes	jg1410125.1
chr3	chr3_nlr_5	complete	84393942	84397948	+	1,4,5,10,3,2,7,11,9,9,11,11,9,9,11,11,11,11	CC			Yes	jg1314614
chr3	chr3_nlr_50	complete	603693842	603695750	-	1,5,10,3,11,11,11,11,11
chr3	chr3_nlr_51	complete (pseudogene)	595855202	595859978	-	18,15,1,4,5,10,3,12,7,11,11,11,11,11,11,11,11,11,11,11,11		TIR
chr3	chr3_nlr_52	partial (pseudogene)	579756033	579757189	-	18,13,1,4,5,10		TIR
chr3	chr3_nlr_53	complete (pseudogene)	546504602	546508465	-	18,15,1,4,5,10,3,12,7,11,11,11,11,11,11,11,11,11,11,11,11,11,11,11,11,11		TIR
chr3	chr3_nlr_54	partial (pseudogene)	542826922	542827751	-	1,4,5,10,3,12,7
chr3	chr3_nlr_55	complete	541844362	541846326	-	1,4,5,10,3,7,11,11,11
chr3	chr3_nlr_56	complete	522955088	522958672	-	17,1,4,5,3,7,11,11,11,11,11,11,11,11,11,11,11,11,11	CC			Yes	jg1389768
chr3	chr3_nlr_57	complete	412873580	412875335	-	1,5,10,3,11,11,11				Yes	jg1369586
chr3	chr3_nlr_58	complete	404971754	404974118	-	1,4,5,10,3,12,7,11,11,11,11,11,9,9,11,11,20				Yes	jg1368290
chr3	chr3_nlr_59	complete	398070119	398072098	-	1,4,5,10,3,7,11,11,11,11,11,11
chr3	chr3_nlr_6	partial (pseudogene)	134840583	134841739	+	18,13,1,4,5,10		TIR
chr3	chr3_nlr_60	complete (pseudogene)	397984695	397989304	-	18,15,1,4,5,10,3,7,11,11,11,11,11,11,11,11,11		TIR		Yes	jg1367125
chr3	chr3_nlr_61	complete (pseudogene)	397908891	397912533	-	1,4,5,10,3,7,11,11,11,11,11,11,11,11,11,11,11,11,11,11,11,11,11,11,11,11,11,11,9,9,11,11
chr3	chr3_nlr_62	complete (pseudogene)	397810153	397812367	-	1,5,10,3,12,7,11,11,11,11,11,11,11,11,11
chr3	chr3_nlr_63	complete	395802158	395805335	-	18,15,13,1,4,5,10,3,12,7,11,11,11,11,11,9,11,11		TIR		Yes	jg1366794
chr3	chr3_nlr_64	complete	298342862	298344773	-	1,4,5,10,3,12,7,11,11,11,11,11,11,11,11,11,11
chr3	chr3_nlr_65	complete	268142177	268146675	-	18,15,13,1,4,5,10,3,12,7,11,11,11,11		TIR
chr3	chr3_nlr_66	complete (pseudogene)	226241616	226245970	-	18,15,13,1,4,5,10,3,12,7,9,9,11,11,11		TIR
chr3	chr3_nlr_67	complete	201431782	201434818	-	18,15,1,4,5,10,3,7,9,11,11,11,11,11,11,11,11,11,11		TIR		Yes	jg1335235
chr3	chr3_nlr_68	complete	139071429	139073775	-	1,4,5,10,3,12,7,11,11,11,11,11,11,11,11,11,11,11,11,11				Yes	jg1324527
chr3	chr3_nlr_69	partial	110840866	110841280	-	4,5,10,3
chr3	chr3_nlr_7	complete	201412386	201415422	+	18,15,1,4,5,10,3,7,9,11,11,11,11,11,11,11,11,11,11		TIR		Yes	jg1335232
chr3	chr3_nlr_70	partial	17924485	17926099	-	18,13,1,4,5,10,3,12,7		TIR		Yes	jg1300614
chr3	chr3_nlr_71	partial	17898449	17900065	-	18,13,1,4,5,10,3,12,7		TIR		Yes	jg1300610.2
chr3	chr3_nlr_72	partial	17886593	17888209	-	18,13,1,4,5,10,3,12,7		TIR		Yes	jg1300610.2
chr3	chr3_nlr_73	partial	17739410	17740587	-	15,1,4,5,10,3,12		TIR
chr3	chr3_nlr_74	partial	7872935	7874523	-	18,15,1,4,5,10,3,12,7		TIR
chr3	chr3_nlr_75	partial	7619631	7621216	-	18,15,1,4,5,10,3,12,7		TIR
chr3	chr3_nlr_76	complete	1259368	1264283	-	18,13,1,4,5,10,3,12,7,9,11,11,9,9,9,11,9,11,11		TIR		Yes	jg1296954
chr3	chr3_nlr_8	complete (pseudogene)	344815218	344817776	+	17,16,1,6,4,5,10,3,12,2,8,7,9,11,11,11,11	CC
chr3	chr3_nlr_9	complete	371336267	371338334	+	1,4,5,10,12,7,11,11,11,11,11,11				Yes	jg1362682.2
chr4	chr4_nlr_1	complete	2434705	2437789	+	18,15,1,4,5,10,3,12,11,11,11,9,11,11,11,11,9		TIR		Yes	jg1544
chr4	chr4_nlr_10	complete	196314991	196317952	+	18,15,1,4,5,10,3,12,7,11,11,11,9,11,9,9,11,11,11		TIR		Yes	jg36964
chr4	chr4_nlr_11	complete	196796903	196798522	+	18,15,1,4,5,10,19		TIR		Yes	jg37042
chr4	chr4_nlr_12	complete (pseudogene)	197163216	197166198	+	18,15,1,4,5,10,3,12,7,11,9,11,11,9,11,9,9,11,11		TIR		Yes	jg37085
chr4	chr4_nlr_13	complete	197936459	197942216	+	18,15,1,4,5,10,3,12,7,9,11,9,11,9,9,9,11,11,11,11,11		TIR
chr4	chr4_nlr_14	partial	198208280	198209884	+	17,1,6,4,5,10,3,12,2,20	CC
chr4	chr4_nlr_15	complete (pseudogene)	198387549	198391047	+	18,15,1,4,5,10,7,11,11,9,11,11,11		TIR		Yes	jg37248
chr4	chr4_nlr_16	complete	200463500	200466472	+	15,1,4,5,10,3,12,7,11,11,11,9,11,9,19,11,11		TIR		Yes	jg37668
chr4	chr4_nlr_17	complete	201082260	201084961	+	18,15,1,4,5,10,3,7,11,11,11,9,11,9		TIR		Yes	jg37741
chr4	chr4_nlr_18	complete	201104454	201107155	+	18,15,1,4,5,10,3,7,11,11,11,9,11,9		TIR		Yes	jg37751
chr4	chr4_nlr_19	partial (pseudogene)	218618953	218619455	+	3,12,2
chr4	chr4_nlr_2	complete (pseudogene)	6440138	6443555	+	18,15,1,4,5,10,3,12,7,9,11,11,9,11,11,11,9,11,11,19		TIR		Yes	jg2440
chr4	chr4_nlr_20	complete	244256727	244258719	+	1,6,4,5,10,3,12,2,7,9,9,9,11,11,11,11,11	CC
chr4	chr4_nlr_21	complete (pseudogene)	245088521	245092531	+	1,4,5,10,3,12,7,11,11,11,11,11,11,11,11,11,11,11
chr4	chr4_nlr_22	complete (pseudogene)	246950598	246952590	+	1,4,5,7,11,11,11,11,9
chr4	chr4_nlr_23	partial (pseudogene)	247127076	247127948	+	1,5,10,3,12,7
chr4	chr4_nlr_24	complete	255398331	255401545	+	18,15,1,4,5,10,3,12,7,11,11,11,11,11,9,11,9,9,9,11,11,11		TIR
chr4	chr4_nlr_25	partial	259211266	259219906	+	18,15,1,4,5,10,3,12,7		TIR
chr4	chr4_nlr_26	complete	265229261	265233641	+	18,13,1,4,5,10,3,12,7,11,11,11,11,11		TIR
chr4	chr4_nlr_27	complete (pseudogene)	277411057	277414032	+	18,13,1,4,5,10,3,12,7,11,11,9		TIR		Yes	jg51340
chr4	chr4_nlr_28	complete	301571246	301573540	+	1,4,5,10,3,12,7,9,11,11,11,11,11,11,11,11,11,11,11,11,11,9
chr4	chr4_nlr_29	complete (pseudogene)	326604743	326606669	+	1,4,5,10,3,12,7,9,11,11,9,11,11,11,11,11,11
chr4	chr4_nlr_3	complete	6530819	6533831	+	18,15,1,4,5,10,3,7,9,11,11,9,11,11,11,9,11,11,9,11		TIR		Yes	jg2446
chr4	chr4_nlr_30	complete (pseudogene)	422875451	422878769	+	18,15,1,4,5,3,12,7,11,11,9,11,11,9,11,9,9,9,11,11		TIR		Yes	jg77940
chr4	chr4_nlr_31	partial (pseudogene)	474140469	474141610	+	18,15,1,4,5		TIR
chr4	chr4_nlr_32	complete (pseudogene)	474328185	474332071	+	18,15,1,4,5,10,3,7,11,11,11,11,11,11,11,11,11,11,11,11,11,11,11		TIR
chr4	chr4_nlr_33	complete (pseudogene)	528309878	528311661	+	1,4,5,3,12,7,11,11,11,11,11,11,11,11
chr4	chr4_nlr_34	complete (pseudogene)	528425802	528427719	+	1,4,5,3,12,7,9,11,11,9,11,11,11,11,9,11
chr4	chr4_nlr_35	complete	536990502	536993053	+	17,1,6,4,5,10,3,12,2,8,7,9,9,9,11,11,11	CC
chr4	chr4_nlr_36	complete	537469625	537472208	+	17,16,1,6,4,5,10,3,12,2,8,7,9,9,9,9,9,11,11,11	CC
chr4	chr4_nlr_37	complete	539869525	539871415	+	1,5,10,3,11,11,11,11,11,11				Yes	jg98471
chr4	chr4_nlr_38	complete	548857584	548859591	+	1,4,5,10,3,7,11,11,11,11,11,11,11,11,9,11,11
chr4	chr4_nlr_39	complete	609917696	609921891	+	18,15,1,4,5,10,3,12,7,9,11,11,11,11,11,11,11,11,11,11,11,11,11,11,11,11		TIR
chr4	chr4_nlr_4	complete	74065180	74068569	+	18,15,1,4,5,10,3,7,11,11,11,11,11,11,11		TIR		Yes	jg15481
chr4	chr4_nlr_40	complete (pseudogene)	612110656	612114138	+	18,1,5,10,3,11,11,11,11,11,11,11,11,11,11,11,11,11		TIR
chr4	chr4_nlr_41	partial (pseudogene)	627239921	627243634	+	18,1,4,5,10,2		TIR
chr4	chr4_nlr_42	complete	640931381	640933233	+	17,16,1,6,4,5,10,3,2,7,9,9,11	CC
chr4	chr4_nlr_43	complete (pseudogene)	650652018	650659249	+	18,13,1,4,5,10,3,12,7,11,11,11,11,11,11,11,11,11,11,11,11,11,11,11,11,11,11,11,11,11,11,11,11,11,11,11,11,11,11		TIR
chr4	chr4_nlr_44	complete	696629660	696632191	-	18,15,13,1,4,5,10,3,12,7,11,11,11,11		TIR		Yes	jg127424
chr4	chr4_nlr_45	complete (pseudogene)	696371006	696373509	-	18,15,13,1,4,5,10,3,12,7,11,11,11,11		TIR
chr4	chr4_nlr_46	partial (pseudogene)	696352645	696354338	-	18,15,13,1,4,5,10,3,12,7		TIR		Yes	jg127382
chr4	chr4_nlr_47	complete (pseudogene)	692181951	692185797	-	1,4,5,10,3,12,7,11,11,11,11,11,11,11,11,11,11,11,11,11,11,11,11,11,11,11,11,11,11,11,11,11,11,11,11
chr4	chr4_nlr_48	complete (pseudogene)	692062867	692074352	-	18,15,13,1,4,5,10,3,12,7,11,11,11,11,11,11,11,11,11,11,11,11,11,11,11,11,11,11,11,11,11,11,11,11,11,11,19,11,11,11,11,11,11,11,11,11,11,11,11,11,11,11,11,11		TIR
chr4	chr4_nlr_49	complete	656581019	656586703	-	1,4,5,10,3,12,7,11,11,11,11,11,11,11,11,11,11,11,11,11,11,11,11,11,11,11,11,11,11,11,11,11,11,11,11,11,11,11,11,11,11
chr4	chr4_nlr_5	complete (pseudogene)	77155597	77158087	+	17,16,1,6,4,5,10,3,12,2,8,7,9,9,9,11,11,11,11,11	CC			Yes	jg15997
chr4	chr4_nlr_50	complete	656318796	656326530	-	18,15,13,1,4,5,10,3,12,7,11,11,11,11,11,11,11,11,11,11,11,11,11,11,11,11,11,11,11,11,11,11,11,11,11,11,11,11,11		TIR
chr4	chr4_nlr_51	complete (pseudogene)	656183751	656189508	-	1,4,5,10,3,12,7,11,11,11,11,11,11,11,11,11
chr4	chr4_nlr_52	complete	656059634	656065218	-	1,4,5,10,3,12,7,11,11,9,11,9,11,9,11,11,11,11,11,11,11,11,11,11,11,11,11,11,11,11,11,11,11,11,11,11,11,11,11,11,11,11,11,11,11,11,11,11,11,11,11,11,11,11,11,11,11
chr4	chr4_nlr_53	complete (pseudogene)	655972451	655980282	-	18,15,1,4,5,10,3,12,7,11,11,11,11,9,11,11,11,11,11,11,11,11,11,11,11,11,11,11,11,11,11,11,11,11,11,11,11,11,11,11,11,11,11,11,11,11,11,11,11,11,11,11,11,11,11,11		TIR
chr4	chr4_nlr_54	complete	626267951	626270165	-	1,4,5,10,3,12,7,11,11,11,11,11,11,11,11,11				Yes	jg113746
chr4	chr4_nlr_55	complete (pseudogene)	589275647	589278871	-	18,13,1,4,5,3,12,7,11,11,11,11,9,11,11,9,9,11,11		TIR
chr4	chr4_nlr_56	complete	589164288	589167617	-	18,13,1,4,5,10,3,12,7,9,11,11,11,11,9,11,11,11,9,9,11,11,11		TIR		Yes	jg107195.2
chr4	chr4_nlr_57	complete	556541627	556543711	-	1,5,10,3,11,11,9,11,11,11				Yes	jg101364
chr4	chr4_nlr_58	complete (pseudogene)	553166959	553170176	-	17,16,1,6,4,5,10,3,12,2,8,7,9,9,19,11,11,11,9	CC
chr4	chr4_nlr_59	partial (pseudogene)	550065137	550065714	-	2,8,7
chr4	chr4_nlr_6	complete	141440473	141443534	+	18,15,1,4,5,10,3,12,7,11,11,11,11,11,11,11,11,11,11,11		TIR
chr4	chr4_nlr_60	complete	548819600	548825534	-	18,15,1,4,5,10,3,7,11,11,11,11,11,11,11,11		TIR
chr4	chr4_nlr_61	complete (pseudogene)	548720033	548723663	-	1,4,5,10,3,7,11,11,11,11,11,11,11,11,11,9,9,11,11,9
chr4	chr4_nlr_62	complete	445797568	445801225	-	1,4,5,10,3,12,7,11,11,11,11,11,11,11,11,11,9,11,11,9,11,9,11,9,11,11,11,11,11,11,11,11,11,11,11,11,11,11,11,11,11
chr4	chr4_nlr_63	complete	319672417	319675405	-	18,15,1,4,5,10,3,11,11,9,11,11,11,11,11,11		TIR
chr4	chr4_nlr_64	complete	319659292	319662280	-	18,15,1,4,5,10,3,11,11,9,11,11,11,11,11,11		TIR
chr4	chr4_nlr_65	partial (pseudogene)	317810428	317812001	-	18,15,1,4,5,10,3,12,7		TIR
chr4	chr4_nlr_66	partial	260873706	260874587	-	1,4,5,3,7
chr4	chr4_nlr_67	partial (pseudogene)	246599059	246603982	-	17,16,1,6,4,10,3	CC
chr4	chr4_nlr_68	complete	242810596	242814405	-	18,13,1,4,5,10,3,12,7,11,11,9,9,11,11,9,11,11,11,11,11,11,11,11		TIR
chr4	chr4_nlr_69	complete (pseudogene)	242757203	242759877	-	18,15,1,4,5,3,12,7,9,9,11,9		TIR
chr4	chr4_nlr_7	complete (pseudogene)	141491701	141494524	+	1,4,5,10,3,12,8,7,11,11,11,11,11,11,11,11,11				Yes	jg27777
chr4	chr4_nlr_70	partial	226735349	226736646	-	18,15,1,4,5,10,3		TIR		Yes	jg42352
chr4	chr4_nlr_71	partial (pseudogene)	218786981	218787483	-	3,12,2
chr4	chr4_nlr_72	complete	201172444	201174776	-	1,4,5,10,3,12,7,9,11,9,11,9,11,11,11
chr4	chr4_nlr_73	complete (pseudogene)	199304057	199306287	-	1,4,5,10,3,12,7,11,11,11,11,11,11,11,11,11,11,11,11,11
chr4	chr4_nlr_74	complete	158557472	158561176	-	18,15,1,4,5,10,3,12,7,11,11,9,11,11,11,11,11,11,11,11,11,11,11,11,11,11,11,11		TIR		Yes	jg30989
chr4	chr4_nlr_75	complete	52850420	52853003	-	17,16,1,6,4,5,10,3,12,2,7,11,9,9,11,9,19,11,11,11	CC
chr4	chr4_nlr_76	complete	7718475	7721307	-	18,15,1,4,5,10,3,7,9,11,11,9,11,11,9,11,11		TIR		Yes	jg2678
chr4	chr4_nlr_77	complete (pseudogene)	7175635	7178094	-	18,15,1,4,5,10,3,7,9		TIR
chr4	chr4_nlr_78	complete	7080469	7083294	-	18,15,1,4,5,10,3,7,9,11,11,9,11,11,9,11,11,11		TIR		Yes	jg2580
chr4	chr4_nlr_79	complete	6733867	6736586	-	18,13,1,4,5,10,3,7,9,11,11,9,11,11,9,11,11		TIR		Yes	jg2501
chr4	chr4_nlr_8	complete	183876383	183879450	+	18,15,1,4,5,10,3,12,7,11,11,9,11,11,11,11,11,11,11		TIR		Yes	jg34896
chr4	chr4_nlr_80	complete	6333562	6336492	-	18,15,1,4,5,10,3,12,7,9,11,11,11,9,11,11,9,11,11,11		TIR		Yes	jg2410.1
chr4	chr4_nlr_9	partial (pseudogene)	196301530	196302856	+	18,15,13,1,4,5,10,3		TIR
chr5	chr5_nlr_1	complete (pseudogene)	1408544	1411466	+	18,15,13,1,4,5,10,3,12,7,9,11,11,11,11		TIR		Yes	jg943097
chr5	chr5_nlr_10	complete (pseudogene)	67542536	67545842	+	1,6,4,5,10,3,12,2,8,7,11,9,9,9,11,9,11,11,11,11,11	CC			Yes	jg956382
chr5	chr5_nlr_11	complete (pseudogene)	94044935	94048240	+	18,1,6,4,5,10,3,12,2,8,7,11,9,9,11,11,11	CC	TIR
chr5	chr5_nlr_12	partial (pseudogene)	95542479	95543635	+	18,15,1,4,5,10		TIR
chr5	chr5_nlr_13	complete (pseudogene)	108116641	108119308	+	18,15,13,1,4,5,10,3,12,19		TIR		Yes	jg963057
chr5	chr5_nlr_14	partial	108201892	108203677	+	6,4,5,10,3,12,2,8,7,11,9,9,9,11,11	CC
chr5	chr5_nlr_15	complete	108254405	108257038	+	17,1,6,4,5,10,3,12,2,7,11,9,9,9,11,9,11,11,11,11	CC			Yes	jg963081
chr5	chr5_nlr_16	complete (pseudogene)	108523895	108527397	+	18,13,1,4,5,3,12,7,11,11,11,11,11,9,9,11,11,11,11		TIR
chr5	chr5_nlr_17	complete (pseudogene)	108656230	108658864	+	17,1,6,4,5,10,3,12,2,8,7,11,9,9,9,11,11,11,11,11	CC
chr5	chr5_nlr_18	complete (pseudogene)	108699725	108704849	+	17,1,4,5,10,3,2,8,7,11,9,9,9,9,9,11,11,11,11,9,9,9,9,11	CC
chr5	chr5_nlr_19	complete	119329971	119331967	+	1,6,4,5,10,3,12,8,7,11,9,9,9,11,9,11,11,11	CC			Yes	jg965006
chr5	chr5_nlr_2	complete	58774240	58776256	+	1,6,4,5,10,3,12,2,8,7,11,9,9,9,11,11,11,11,11	CC
chr5	chr5_nlr_20	complete	125992441	125995544	+	18,15,1,4,5,10,3,11,11,11,11,11,11		TIR
chr5	chr5_nlr_21	partial	199082898	199084644	+	18,15,13,1,4,5,10,3,7		TIR		Yes	jg977836
chr5	chr5_nlr_22	complete (pseudogene)	210931736	210934873	+	18,1,4,5,10,3,9,9,11		TIR
chr5	chr5_nlr_23	complete (pseudogene)	212058795	212063683	+	17,1,4,5,10,3,12,7,11,11,11,11,11,11,19	CC
chr5	chr5_nlr_24	partial (pseudogene)	212320307	212320943	+	1,4,5,10,3,12
chr5	chr5_nlr_25	complete	212759692	212764820	+	18,15,1,4,5,10,3,12,7,11,11,11,11,11,11,11		TIR		Yes	jg979784.1
chr5	chr5_nlr_26	complete	213689964	213694242	+	18,15,1,4,5,10,3,12,7,11,11,11,11,11,11,11,9,11,11,11,11,11,11,11,11,11,11,11,11,11,11,11,11		TIR
chr5	chr5_nlr_27	complete (pseudogene)	214490948	214494760	+	1,4,5,10,3,12,7,11,11,11,11,11,11,19,9
chr5	chr5_nlr_28	complete	245668148	245671347	+	18,15,1,4,5,10,3,12,7,11,11,11,11,11,11,11		TIR		Yes	jg985136
chr5	chr5_nlr_29	partial	250031478	250034590	+	18,15,1,4,5,3,12		TIR
chr5	chr5_nlr_3	partial (pseudogene)	60228055	60231269	+	6,10,3,2,8,7,9	CC
chr5	chr5_nlr_30	complete	254122529	254125729	+	18,15,1,4,5,10,3,12,7,11,11,9,11,11,9,11,9,9,11,11		TIR		Yes	jg986750
chr5	chr5_nlr_31	complete	280744249	280753132	+	18,15,1,4,5,10,3,12,7,11,9,11,11,11,9,9,11,11		TIR
chr5	chr5_nlr_32	partial (pseudogene)	370026812	370028827	+	4,5,10,3,12,7,11,11,11,11,11,11
chr5	chr5_nlr_33	complete (pseudogene)	632716180	632718223	+	1,5,10,3,11,11,11,11,11,11,11				Yes	jg1052299
chr5	chr5_nlr_34	complete (pseudogene)	652667629	652670929	+	1,4,5,3,12,7,11,11,11,11,11,11,11,11,11,11,11,11,11,11,11,11,11,11,11,11,11,11,11,11,11,11,11
chr5	chr5_nlr_35	complete	667785397	667788559	+	18,13,1,4,5,10,3,12,7,11,11,9,11,11,11,11		TIR		Yes	jg1058224
chr5	chr5_nlr_36	complete	663739796	663747362	-	18,15,1,4,5,10,3,12,7,11,11,11,11,11,11,11,11,11,11,11,11,11,11,11,11,11,11,11,11,11,11,11,11,11,11,11,11,11,11,11,11,11		TIR		Yes	jg1057552
chr5	chr5_nlr_37	partial (pseudogene)	577763118	577765815	-	13,1,4,5,10,3,12,7		TIR
chr5	chr5_nlr_38	partial (pseudogene)	577672243	577674941	-	13,1,4,5,10,3,12,7		TIR
chr5	chr5_nlr_39	complete (pseudogene)	577500594	577505431	-	18,13,1,4,5,10,3,12,7,11,11,11,11,9,11,9,11,11,11,11,11,11,11,11,11,11,11,11,11,11,11,11		TIR		Yes	jg1042820
chr5	chr5_nlr_4	complete	60516877	60518911	+	1,6,4,5,10,3,12,2,8,7,11,9,9,9,11,9,11,11,11,11	CC
chr5	chr5_nlr_40	complete	462246827	462249971	-	18,15,1,4,5,10,3,7,11,11,11,11		TIR		Yes	jg1022938
chr5	chr5_nlr_41	partial	379789624	379790017	-	1,4,5,10
chr5	chr5_nlr_42	complete (pseudogene)	311212456	311215955	-	18,13,1,4,5,10,12,7,11,11,11,9,11,9,9,9,11,11,11		TIR		Yes	jg996045
chr5	chr5_nlr_43	complete	252733894	252737575	-	18,13,1,4,5,10,3,12,8,7,11,11,11,11,11,9,11,11,9,11		TIR
chr5	chr5_nlr_44	complete	252265793	252269290	-	18,13,1,4,5,10,3,12,7,11,11,11,11,9,11,9,9,9,11,11,11		TIR
chr5	chr5_nlr_45	partial (pseudogene)	252026892	252028521	-	18,13,1,4,5,10,3,12,7		TIR
chr5	chr5_nlr_46	partial	250006241	250009353	-	18,15,1,4,5,3,12		TIR
chr5	chr5_nlr_47	partial (pseudogene)	230778234	230779818	-	18,15,13,1,4,5,10,3,12,7		TIR
chr5	chr5_nlr_48	complete	131114604	131122279	-	18,15,1,4,5,3,7,11,11,11,11,11		TIR		Yes	jg966839
chr5	chr5_nlr_49	partial (pseudogene)	122359692	122361302	-	18,13,1,4,5,3,12,7		TIR
chr5	chr5_nlr_5	complete (pseudogene)	61600108	61609146	+	17,1,6,5,10,3,12,2,8,11,9,9,9,11,11,11,11,11	CC
chr5	chr5_nlr_50	partial (pseudogene)	122227255	122228835	-	18,15,1,4,5,10,3,12,7		TIR		Yes	jg965580
chr5	chr5_nlr_51	partial	122018296	122019860	-	18,15,1,4,5,3,12,7		TIR
chr5	chr5_nlr_52	complete	121718327	121722114	-	18,13,1,4,5,10,3,7,9,11,11,9,11,11,9,11,11,11,11,9,11,11,11		TIR		Yes	jg965488
chr5	chr5_nlr_53	complete	111035210	111038538	-	17,1,6,4,5,10,3,12,2,8,7,11,9,9,9,11,9,11,11,11,11,11,11,11,11	CC
chr5	chr5_nlr_54	complete (pseudogene)	108825763	108827791	-	1,6,4,5,10,3,2,8,7,11,9,9,9,9,11,11,11,11	CC
chr5	chr5_nlr_55	complete	108820581	108822586	-	1,6,5,10,3,12,2,8,7,11,9,9,9,11,11,11	CC
chr5	chr5_nlr_56	complete	108744771	108747381	-	17,1,6,4,5,10,3,12,2,8,7,11,9,9,9,11,9,11,11,11,11	CC			Yes	jg963176
chr5	chr5_nlr_57	complete	106814970	106818443	-	18,15,1,4,5,10,3,12,7,11,11,11,9,11,9,9,11,11,11,11		TIR		Yes	jg962845
chr5	chr5_nlr_58	complete (pseudogene)	106145735	106149650	-	18,13,1,4,5,10,3,12,7,9,11,11,11,11,9,9,11,9,11,11,11,11		TIR		Yes	jg962750
chr5	chr5_nlr_59	complete	106085331	106088863	-	18,13,1,4,5,10,3,12,7,9,11,11,11,11,9,9,11,11,11		TIR
chr5	chr5_nlr_6	complete (pseudogene)	61975872	61977860	+	1,6,4,5,10,3,12,2,7,11,9,9,9,11,11,11,11,11	CC
chr5	chr5_nlr_60	complete	105979848	105983746	-	18,15,1,4,5,10,3,12,7,9,11,11,11,9,11,11,9,9,11,9,11,11		TIR
chr5	chr5_nlr_61	complete	66790305	66792938	-	17,1,6,4,5,10,3,12,2,8,7,9,9,9,9,11,9,11,11,11,11	CC
chr5	chr5_nlr_62	partial (pseudogene)	63390856	63391728	-	1,6,5,10,3,2,8	CC
chr5	chr5_nlr_63	complete	61863558	61866201	-	17,1,6,4,5,10,3,12,2,8,7,11,9,9,9,11,9,11,11,11,11	CC
chr5	chr5_nlr_64	partial (pseudogene)	61333341	61334200	-	1,5,10,3,2,8	CC
chr5	chr5_nlr_65	complete	61138396	61141033	-	17,1,6,4,5,10,3,2,8,7,11,9,9,9,9,11,11,11,11	CC
chr5	chr5_nlr_66	complete	60173751	60175175	-	1,6,4,5,10,3,12,2,8,7,11,9,9,9,11	CC			Yes	jg954977
chr5	chr5_nlr_67	complete (pseudogene)	60041406	60049680	-	1,4,10,3,12,2,8,7,9,9,9,11,11,11,11	CC
chr5	chr5_nlr_68	complete	59928835	59931481	-	17,1,6,4,5,10,3,12,2,8,7,9,9,9,9,11,9,11,11,11,11	CC			Yes	jg954924
chr5	chr5_nlr_69	complete	59627369	59630009	-	17,1,6,4,5,10,3,12,2,8,7,11,9,9,9,11,11,11,11,11	CC			Yes	jg954873
chr5	chr5_nlr_7	complete	63569139	63571170	+	1,6,4,5,10,3,12,2,7,11,9,9,9,11,9,11,11,11,11	CC
chr5	chr5_nlr_70	complete	59104568	59107205	-	17,1,6,4,5,10,3,12,2,8,7,11,9,9,9,11,11,11,11,11	CC			Yes	jg954763
chr5	chr5_nlr_71	partial	56377038	56378939	-	16,4,5,10,3,12,2,7,11,9,9,9,11,9,11,11,11,11	CC
chr5	chr5_nlr_72	complete (pseudogene)	37984498	37987728	-	18,13,1,4,5,10,3,12,7,11,9,11,9,11,9,9,11,9,9,11,11		TIR
chr5	chr5_nlr_73	partial (pseudogene)	37668194	37669845	-	18,13,1,4,5,10,3,12,7		TIR
chr5	chr5_nlr_74	complete	20679703	20683504	-	18,15,13,1,5,10,3,7,11,11,9,9,9,11,11,11		TIR		Yes	jg946940
chr5	chr5_nlr_75	complete (pseudogene)	3106040	3112211	-	18,15,1,4,5,10,3,12,7,11,11,11,11,11,11,11,11,11,11,11,11,11,11,11,11,11,11,11,11,11,11,11,11,11,11,11,11,11,11,11,11,11,11,11,11,11		TIR		Yes	jg943433
chr5	chr5_nlr_8	complete	63665016	63669140	+	1,6,4,5,10,3,12,2,8,7,11,9,9,9,11,9,11,11,11,11,9	CC
chr5	chr5_nlr_9	complete	63680955	63685079	+	1,6,4,5,10,3,12,2,8,7,11,9,9,9,11,9,11,11,11,11,9	CC
chr6	chr6_nlr_1	complete (pseudogene)	6875783	6877549	+	1,5,10,3,7,11,11,11,9
chr6	chr6_nlr_10	complete (pseudogene)	45376441	45379697	+	18,15,1,4,5,10,3,12,7,11,11,11,11,11,11,11,11,11,11		TIR		Yes	jg1071733
chr6	chr6_nlr_100	partial (pseudogene)	107806076	107810496	-	15,4,5,10,3,2,7,11,11,11,11,11,11		TIR
chr6	chr6_nlr_101	complete	107358369	107362332	-	1,6,4,5,3,2,11,11	CC		RNL
chr6	chr6_nlr_102	complete	107279332	107282769	-	1,6,4,10,3,2,11,11,11,11,11	CC			Yes	jg1081801.1
chr6	chr6_nlr_103	complete	102019402	102022071	-	1,6,4,5,10,3,2,7,11,11,11,11,11,11	CC		RNL	Yes	jg1081227
chr6	chr6_nlr_104	complete (pseudogene)	101874690	101881419	-	13,1,6,4,5,10,3,2,7,11,11,11,11,11,11,11	CC	TIR	RNL
chr6	chr6_nlr_105	complete	98457596	98460496	-	1,6,4,5,10,3,2,7,11,11,11,11,11	CC		RNL
chr6	chr6_nlr_106	complete	98377373	98380065	-	1,6,4,5,10,3,2,7,11,11,11,11,11	CC
chr6	chr6_nlr_107	complete	98280068	98282638	-	1,6,4,5,10,3,2,7,11,11,11,11,11	CC		RNL	Yes	jg1080713
chr6	chr6_nlr_108	complete	98197879	98200443	-	1,6,4,5,10,3,2,7,11,11,11,11,11	CC		RNL	Yes	jg1080705.1
chr6	chr6_nlr_109	complete (pseudogene)	98157809	98161581	-	18,1,6,4,5,10,3,2,7,11,11,11,11	CC	TIR		Yes	jg1080704
chr6	chr6_nlr_11	complete	45652262	45655639	+	18,1,6,4,5,10,3,7,11,11,11,11,11,11,11,11,11,11,11,9,11,11,11,9	CC	TIR
chr6	chr6_nlr_110	complete	98076625	98079710	-	1,6,4,5,10,3,2,7,11,11,11,11,11	CC		RNL	Yes	jg1080686
chr6	chr6_nlr_111	complete	97996254	97999417	-	1,6,4,5,10,3,2,7,9,11,11,11,11,11	CC		RNL	Yes	jg1080680
chr6	chr6_nlr_112	complete	97634047	97636875	-	1,6,4,5,10,3,2,7,11,11,11,11,11	CC		RNL
chr6	chr6_nlr_113	complete	95699628	95702360	-	1,6,4,5,10,3,2,7,11,11,11,11,11	CC		RNL	Yes	jg1080317
chr6	chr6_nlr_114	complete	95306330	95314484	-	1,6,4,5,10,3,2,7,11,11,11,11,11,11	CC		RNL	Yes	jg1080250
chr6	chr6_nlr_115	complete	94950948	94954533	-	1,6,4,5,10,3,2,7,11,11,11,11,11,11	CC		RNL	Yes	jg1080194
chr6	chr6_nlr_116	complete	94308333	94311297	-	1,4,5,10,3,2,7,11,11,11,11,11,11	CC		RNL	Yes	jg1080109
chr6	chr6_nlr_117	complete	90282894	90285261	-	16,1,6,4,5,10,3,12,2,8,7,9,9,11,11,11,11,11	CC
chr6	chr6_nlr_118	complete (pseudogene)	79934774	79938593	-	18,15,1,4,5,10,3,12,7,11,11,11,11,9,9,11,11		TIR
chr6	chr6_nlr_119	partial (pseudogene)	79905107	79909351	-	18,13,1,4,5,2,7		TIR		Yes	jg1077570
chr6	chr6_nlr_12	complete	50354543	50357075	+	17,16,1,6,4,5,10,3,12,2,8,7,9,9,9,11,11,11,11	CC
chr6	chr6_nlr_120	complete	79878675	79882653	-	18,13,1,4,5,10,3,12,7,11,11,11,11,11,11,9,11,9,11,11,11		TIR		Yes	jg1077566
chr6	chr6_nlr_121	complete (pseudogene)	75632455	75635080	-	17,16,1,6,4,5,10,3,12,2,7,11,9,9,11,9,19,11,11	CC
chr6	chr6_nlr_122	partial (pseudogene)	65153758	65154846	-	4,5,10,3,12,2,8,7,9,9,11	CC			Yes	jg1075203
chr6	chr6_nlr_123	complete	62801608	62804152	-	17,16,1,6,4,5,10,3,12,2,8,7,11,9,9,11,11,11,11	CC
chr6	chr6_nlr_124	complete (pseudogene)	62363983	62366392	-	17,16,1,6,4,5,10,12,2,8,7,11,9,9,11,11,11	CC
chr6	chr6_nlr_125	complete	59200820	59203373	-	17,16,1,6,4,10,3,12,2,7,9,9,9,11,11,11,11	CC
chr6	chr6_nlr_126	complete	58558990	58561537	-	17,16,1,6,4,5,10,3,12,2,7,9,9,11,11,11,11	CC
chr6	chr6_nlr_127	partial	47007145	47008045	-	1,5,10,3,7				Yes	jg1072045
chr6	chr6_nlr_128	complete (pseudogene)	39011081	39015474	-	13,1,4,5,10,3,7,11,11,11,11,11,11,11,11,11,11,11,11,11,9,9		TIR		Yes	jg1070879
chr6	chr6_nlr_129	complete	38821504	38824657	-	18,15,1,4,5,10,3,7,11,11,11,11,11,11,11,11,11,11,9,11,11		TIR		Yes	jg1070859
chr6	chr6_nlr_13	complete	50601837	50604378	+	17,16,1,6,4,5,10,3,12,2,8,7,9,9,9,11,11,11,11	CC
chr6	chr6_nlr_130	complete (pseudogene)	23408456	23410550	-	1,4,5,10,11,11,11,9,11,11,11
chr6	chr6_nlr_131	complete (pseudogene)	23328262	23332491	-	1,4,5,10,3,12,7,11,11,11,9,11,11,11,9
chr6	chr6_nlr_132	complete (pseudogene)	22046856	22048956	-	18,15,1,4,5,12,11		TIR
chr6	chr6_nlr_133	complete	8906027	8907938	-	1,5,10,3,11,11,11,11,11,11				Yes	jg1065289
chr6	chr6_nlr_134	complete (pseudogene)	8759093	8761705	-	1,5,10,3,7,11,11,11,11,11,11,11
chr6	chr6_nlr_135	complete (pseudogene)	8725968	8730949	-	1,5,10,3,7,11,11,11,11,11,11,19,9
chr6	chr6_nlr_136	complete	8691607	8693521	-	1,5,10,3,7,11,11,11,11,11,11				Yes	jg1065228
chr6	chr6_nlr_137	partial	8673993	8674563	-	1,5,10,3				Yes	jg1065226
chr6	chr6_nlr_138	complete	8643513	8645423	-	1,5,10,3,7,11,11,11,11,11,11				Yes	jg1065223
chr6	chr6_nlr_139	complete	8618472	8620386	-	1,5,10,3,7,11,11,11,11,11,11				Yes	jg1065221
chr6	chr6_nlr_14	partial (pseudogene)	50622428	50623048	+	1,5,10,3,12,2
chr6	chr6_nlr_140	complete	8542419	8544309	-	1,5,10,3,11,11,11,11,11,11
chr6	chr6_nlr_141	complete	4618346	4620407	-	1,5,10,3,7,11,11,11,11,11,11,11				Yes	jg1064488
chr6	chr6_nlr_142	complete (pseudogene)	4125508	4128972	-	1,5,10,3,7,11,11,19				Yes	jg1064409
chr6	chr6_nlr_15	complete (pseudogene)	50652499	50653834	+	1,6,4,5,10,3,12,2,7,9,9,9,11	CC
chr6	chr6_nlr_16	complete (pseudogene)	50699663	50702189	+	17,16,1,6,4,5,10,3,12,2,7,9,9,11,11,11,11	CC
chr6	chr6_nlr_17	complete (pseudogene)	50714052	50715301	+	1,6,4,5,3,12,2,8,7,9,9,11	CC
chr6	chr6_nlr_18	complete (pseudogene)	50762667	50765193	+	17,16,1,6,4,5,10,3,12,2,8,7,9,9,9,11,11,11,11	CC			Yes	jg1072607
chr6	chr6_nlr_19	complete (pseudogene)	50825459	50828701	+	17,16,1,6,4,5,10,3,12,2,8,7,9,9,9,11,11,11,11	CC
chr6	chr6_nlr_2	complete	13103155	13104829	+	1,5,10,3,7,11,9
chr6	chr6_nlr_20	complete (pseudogene)	50842635	50844359	+	17,16,1,4,10,3,12,2,7,9,9	CC
chr6	chr6_nlr_21	partial	50875869	50876095	+	5,10,3
chr6	chr6_nlr_22	complete	50878023	50880483	+	17,16,1,6,4,5,10,3,12,2,8,7,9,9,9,11,11,11,11	CC			Yes	jg1072640
chr6	chr6_nlr_23	partial (pseudogene)	50887170	50887982	+	5,10,3,11,11
chr6	chr6_nlr_24	complete	50889824	50892350	+	17,16,1,6,4,5,10,3,12,2,8,7,9,9,9,11,11,11,11	CC
chr6	chr6_nlr_25	complete (pseudogene)	50905813	50907663	+	17,16,1,4,5,10,3,12,2,7,9,9,11	CC
chr6	chr6_nlr_26	partial	50950234	50951917	+	5,10,3,12,2,8,7,9,9,11,11,11,11,11	CC
chr6	chr6_nlr_27	complete	51125168	51127584	+	17,16,1,6,5,10,3,12,2,8,7,9,9,9,11,11,11	CC			Yes	jg1072677
chr6	chr6_nlr_28	complete	51544068	51546597	+	17,16,1,6,4,5,10,3,12,2,8,7,11,9,9,11,11,11,11	CC
chr6	chr6_nlr_29	complete	51653504	51656057	+	17,16,1,6,4,5,10,3,12,2,8,7,11,9,9,11,11,11,11	CC
chr6	chr6_nlr_3	complete	13392026	13393688	+	1,5,10,3,11,11				Yes	jg1066206
chr6	chr6_nlr_30	complete	54099887	54102425	+	17,16,1,6,4,5,10,3,12,2,8,7,9,9,9,11,11,11	CC
chr6	chr6_nlr_31	complete	64002508	64006341	+	18,15,13,1,4,5,10,3,12,7,9,11,11,11,11,9,11,11,11,11,11,11,11,11,11,9,11,11,11,11		TIR
chr6	chr6_nlr_32	complete	89047156	89049704	+	17,16,1,6,4,5,10,3,12,2,7,9,9,11,11,11,11,11	CC
chr6	chr6_nlr_33	partial	94800313	94802615	+	6,4,5,3,2,7,11,11,11,11,11,11	CC			Yes	jg1080167
chr6	chr6_nlr_34	partial	94918569	94920916	+	6,4,5,3,2,7,11,11,11,11,11,11	CC			Yes	jg1080190
chr6	chr6_nlr_35	complete	96317254	96320433	+	1,6,4,5,10,3,2,7,11,11,11,11	CC		RNL	Yes	jg1080436
chr6	chr6_nlr_36	partial (pseudogene)	96470401	96472714	+	6,4,5,10,3,2,7,19,11,11,11,11	CC			Yes	jg1080451
chr6	chr6_nlr_37	partial (pseudogene)	96475908	96477979	+	4,5,10,3,2,7,11,11,11,11,11	CC			Yes	jg1080451
chr6	chr6_nlr_38	complete	96768881	96772093	+	1,6,4,5,10,3,2,7,11,11,11,11,11	CC		RNL	Yes	jg1080504
chr6	chr6_nlr_39	partial	96963778	96966011	+	6,4,5,10,3,2,7,11,11,11,11,11	CC			Yes	jg1080530
chr6	chr6_nlr_4	complete	22494354	22496811	+	1,4,5,10,3,12,7,11,11,11,9,11,9,11,11,11				Yes	jg1067877
chr6	chr6_nlr_40	complete (pseudogene)	97446906	97449986	+	1,6,4,5,10,3,2,7,11,11,11	CC		RNL
chr6	chr6_nlr_41	complete	101706883	101709820	+	1,4,5,10,3,2,7,11,11,11,11,11,11	CC		RNL
chr6	chr6_nlr_42	complete	106630515	106633499	+	1,6,4,10,3,2,7,11,11,11	CC		RNL
chr6	chr6_nlr_43	complete	106909327	106912168	+	1,6,4,5,10,3,2,7,11,11,11,11,11,11	CC		RNL	Yes	jg1081732
chr6	chr6_nlr_44	complete	107094834	107097693	+	1,6,4,5,10,3,2,7,11,11,11,11,11,11	CC			Yes	jg1081761
chr6	chr6_nlr_45	complete	107330924	107333882	+	1,6,4,10,3,2,11,11,11,11,11	CC			Yes	jg1081807.1
chr6	chr6_nlr_46	partial	108012111	108014438	+	4,5,10,3,2,7,11,11,11,11,11,11	CC			Yes	jg1081889
chr6	chr6_nlr_47	partial	108793613	108796021	+	4,5,10,3,2,7,11,11,11,11,11	CC			Yes	jg1081963
chr6	chr6_nlr_48	partial (pseudogene)	110545048	110548468	+	6,4,5,3,2,7	CC
chr6	chr6_nlr_49	complete (pseudogene)	110586934	110591336	+	13,1,6,4,5,10,3,2,7,19,11,11,11,11,11	CC	TIR	RNL
chr6	chr6_nlr_5	complete	24924291	24926644	+	17,16,1,6,4,5,10,3,12,2,8,7,9,9,9,11,11,11	CC			Yes	jg1068329
chr6	chr6_nlr_50	complete	114550237	114552799	+	17,16,1,6,4,5,10,3,12,2,7,11,9,9,11,9,11,11,11	CC			Yes	jg1082913
chr6	chr6_nlr_51	complete	114620846	114623448	+	17,16,1,6,4,5,10,3,12,2,7,9,9,11,11,11,11	CC			Yes	jg1082923
chr6	chr6_nlr_52	complete	114679113	114681705	+	17,16,1,6,4,5,10,3,12,2,7,11,9,9,11,11,11,11	CC			Yes	jg1082932
chr6	chr6_nlr_53	complete	114710293	114712898	+	17,16,1,6,4,5,10,3,12,2,7,9,9,11,11,11,11	CC			Yes	jg1082936
chr6	chr6_nlr_54	partial	114758456	114759739	+	17,1,5,10,3,12,2	CC
chr6	chr6_nlr_55	complete	127234520	127239202	+	18,15,1,5,10,3,12,7,11,11,11,11,9,11,11,11,11,11,11,9,11,11,11		TIR		Yes	jg1084955
chr6	chr6_nlr_56	complete	127250093	127254819	+	18,15,1,5,10,3,12,7,11,11,11,11,11,11,11,11,11,11,11,9,11,11,11		TIR		Yes	jg1084960
chr6	chr6_nlr_57	complete	127356503	127361629	+	18,15,1,5,10,3,12,7,11,11,11,11,11,11,11,11,11,11,9,11,11,11		TIR		Yes	jg1084982
chr6	chr6_nlr_58	complete	127591025	127595387	+	18,15,1,4,5,10,3,7,11,11,11,11,9,11,11,11,11,11,11,9,11,11,11,11		TIR		Yes	jg1085024
chr6	chr6_nlr_59	complete	131463847	131466399	+	17,16,1,6,4,5,10,3,12,2,7,11,9,9,11,11,11,11,11	CC
chr6	chr6_nlr_6	complete (pseudogene)	24953395	24955795	+	17,16,1,6,4,5,10,3,12,2,8,7,9,9,11,11,11,11	CC
chr6	chr6_nlr_60	complete	131483119	131485671	+	17,16,1,6,4,5,10,3,12,2,7,11,9,9,11,11,11,11,11	CC
chr6	chr6_nlr_61	complete (pseudogene)	188488412	188490977	+	17,16,1,6,5,10,3,12,2,7,11,9,9,11,11,11,11	CC			Yes	jg1094262
chr6	chr6_nlr_62	complete	191149090	191154097	+	18,13,1,4,5,10,3,12,7,11,11,11,11		TIR
chr6	chr6_nlr_63	partial (pseudogene)	210141703	210142085	+	12,2,8	CC
chr6	chr6_nlr_64	complete (pseudogene)	241774534	241776548	+	16,1,4,5,10,12,2,7,11,11	CC
chr6	chr6_nlr_65	complete (pseudogene)	260096009	260098416	+	17,1,6,4,5,10,3,12,2,7,9,9,19,11,11	CC
chr6	chr6_nlr_66	complete	391280661	391283345	+	1,4,5,10,3,12,7,11,11,11,9,11,9,9,11,11,9				Yes	jg1129876
chr6	chr6_nlr_67	partial	473212167	473214427	+	4,5,10,3,12,2,7,11,11,11,11	CC			Yes	jg1144828
chr6	chr6_nlr_68	complete (pseudogene)	473432764	473436733	+	1,4,10,3,12,2,19,11,11,11,11	CC			Yes	jg1144877
chr6	chr6_nlr_69	partial (pseudogene)	482621687	482625554	+	4,5,10,3,2,8	CC
chr6	chr6_nlr_7	complete (pseudogene)	24989636	24992104	+	17,16,1,6,4,5,10,3,12,2,8,7,9,9,9,11,11,19,11,11	CC
chr6	chr6_nlr_70	complete	541996415	542000512	+	18,15,1,4,5,10,3,12,7,11,11,11,11,11,11,9,9,9,11,11,11		TIR
chr6	chr6_nlr_71	complete	603628832	603631613	+	18,15,13,1,4,5,10,3,12,7,11,11		TIR		Yes	jg1167682.2
chr6	chr6_nlr_72	complete	639370173	639374404	+	18,15,13,1,4,5,10,3,12,7,11,11,11,11		TIR
chr6	chr6_nlr_73	complete (pseudogene)	662457089	662459464	+	1,4,5,10,3,12,7,11,11,9,9,9,9,9,11,11
chr6	chr6_nlr_74	complete (pseudogene)	654334520	654344328	-	18,13,1,4,5,10,3,12,7,11,11,9,9,9,9,9,9,9		TIR
chr6	chr6_nlr_75	complete	654163639	654165919	-	1,4,5,10,3,12,7,11,11,9,9,11,9,9,11				Yes	jg1176754
chr6	chr6_nlr_76	complete	653688987	653695928	-	18,15,1,4,5,10,3,12,7,11,11,9,9,9,9,11		TIR
chr6	chr6_nlr_77	complete	556218276	556223954	-	18,15,1,4,5,10,3,12,7,9,11,11,11,11,11		TIR		Yes	jg1159451
chr6	chr6_nlr_78	partial (pseudogene)	442856780	442857276	-	1,6,4	CC
chr6	chr6_nlr_79	partial	410086722	410088555	-	5,10,3,7,9,11,11,9
chr6	chr6_nlr_8	complete (pseudogene)	25026063	25027796	+	17,1,6,4,5,10,3,12,2,8,7,9,9,9	CC
chr6	chr6_nlr_80	partial (pseudogene)	403043569	403046344	-	17,16,1,6,4,3,12,2,8	CC
chr6	chr6_nlr_81	partial (pseudogene)	402766614	402768006	-	17,16,1,4,5,10,12,2,8	CC
chr6	chr6_nlr_82	partial (pseudogene)	402706668	402708061	-	17,16,1,4,5,3,12,2,8	CC
chr6	chr6_nlr_83	partial (pseudogene)	402618859	402620029	-	17,16,1,4,5,10,3,12	CC
chr6	chr6_nlr_84	partial (pseudogene)	402613611	402614273	-	1,4,5,10,3,12
chr6	chr6_nlr_85	partial (pseudogene)	402495677	402497069	-	17,1,4,5,10,3,12,2,8	CC
chr6	chr6_nlr_86	partial (pseudogene)	402411742	402413389	-	17,16,1,6,4,5,10,3,12,2,8,20	CC
chr6	chr6_nlr_87	complete	298829695	298832190	-	17,1,6,4,5,10,3,12,2,7,11,9,9,9,11,11,11	CC			Yes	jg1112860
chr6	chr6_nlr_88	complete (pseudogene)	295774529	295778608	-	18,16,1,6,4,5,10,3,12,2,8,7,11,9,9,19,11,11,11	CC	TIR
chr6	chr6_nlr_89	complete (pseudogene)	293683856	293686363	-	17,1,6,4,5,10,3,12,2,7,11,9,9,11,11,11	CC
chr6	chr6_nlr_9	complete	30759614	30761926	+	1,5,10,3,11,11,11,11,11,11,11,11,11,11,11				Yes	jg1069367
chr6	chr6_nlr_90	complete	286673022	286674839	-	1,6,4,5,10,3,12,2,7,11,9,9,11,11	CC
chr6	chr6_nlr_91	partial (pseudogene)	286656278	286658647	-	4,5,10,3,2,7,9,9	CC
chr6	chr6_nlr_92	complete (pseudogene)	285927241	285929734	-	17,1,6,4,5,10,3,12,2,7,11,9,9,19,11,11,11	CC			Yes	jg1110453
chr6	chr6_nlr_93	complete (pseudogene)	285347645	285350150	-	17,1,6,4,5,10,3,12,2,7,11,9,9,19,9,11,11,11	CC
chr6	chr6_nlr_94	complete (pseudogene)	274146847	274151286	-	1,6,4,5,10,3,12,2,7,9,9,11,11,11	CC
chr6	chr6_nlr_95	complete	229599594	229601330	-	17,1,6,4,5,10,3,2,8,7,9,9	CC
chr6	chr6_nlr_96	partial (pseudogene)	229388453	229390083	-	10,3,12,2,7,9,9,9,11,11,11,11,11	CC
chr6	chr6_nlr_97	complete	131949203	131953166	-	18,13,1,4,5,10,3,12,7,11,11,9,11,11,11,11,11,11,11,11,9,11,11,11,11,11,11		TIR		Yes	jg1085646
chr6	chr6_nlr_98	complete	127094531	127096919	-	16,1,6,4,5,10,3,12,2,8,7,9,9,11,11,11,11	CC			Yes	jg1084946
chr6	chr6_nlr_99	partial (pseudogene)	118124375	118125014	-	5,10,3,12,2,7	CC
chr7	chr7_nlr_1	complete	50145921	50147682	+	1,4,5,10,3,12,7,11,11,11,11,11,11,11
chr7	chr7_nlr_10	complete (pseudogene)	553910718	553913127	+	18,1,4,10,3,2,8,7,11,9,9,9,11,9,11,11,11,19		TIR		Yes	jg444834
chr7	chr7_nlr_11	complete	554365612	554368211	+	17,1,4,5,10,3,2,8,7,11,9,9,9,11,9,11,11,11,11	CC
chr7	chr7_nlr_12	complete (pseudogene)	554557177	554565565	+	17,1,4,5,10,3,2,8,7,11,9,9,9,11,9,11,11,11,19	CC
chr7	chr7_nlr_13	complete	555082346	555087027	+	17,1,4,5,10,3,2,7,11,9,9,9,11,9,11,11,11,11,11	CC
chr7	chr7_nlr_14	partial	630824146	630824338	+	4,5,10
chr7	chr7_nlr_15	complete (pseudogene)	633332731	633335995	-	15,1,4,5,3,7,11,11,11,11,11,9,11,11,11,11		TIR
chr7	chr7_nlr_16	complete	554807507	554810222	-	1,6,5,10,3,2,8,7,11,9,9,9,11,11,11,11,11,9	CC
chr7	chr7_nlr_17	complete	527773245	527776705	-	18,13,1,4,5,10,3,12,7,9,11,11,11,11,11,11,9,11,11,11		TIR		Yes	jg440612
chr7	chr7_nlr_18	complete	373531187	373533769	-	17,16,1,6,4,5,10,3,12,2,7,11,9,9,19,11,11,11	CC
chr7	chr7_nlr_19	complete (pseudogene)	372604583	372611896	-	18,15,1,4,5,10,3,7,11,9,11,9,11,11,11,11,11,9,9,11,11,9,11,11,11,11,11,11,11,11		TIR
chr7	chr7_nlr_2	complete	226428828	226431617	+	18,15,1,4,5,10,3,7,9,11,11,11		TIR		Yes	jg388431
chr7	chr7_nlr_20	complete (pseudogene)	367316718	367318601	-	1,4,5,3,7,9,11,11,11,11,11,11,11
chr7	chr7_nlr_21	partial	350677203	350678490	-	18,15,1,5,10,3		TIR
chr7	chr7_nlr_22	partial (pseudogene)	336167476	336169403	-	18,15,1,4,5,10,3,12,7,20		TIR		Yes	jg406100.1
chr7	chr7_nlr_23	complete	335950268	335954766	-	18,15,1,4,5,10,3,12,7,11,11,11,11,11,11,11,11,11,11		TIR
chr7	chr7_nlr_24	complete (pseudogene)	335647530	335651141	-	18,15,1,4,5,10,3,7,11,9,11,11,11,11,11,11,11,11		TIR
chr7	chr7_nlr_25	complete	287055462	287057920	-	18,13,1,5,10,3,12,7,11,11,11,11,11,11,11,11		TIR		Yes	jg398312
chr7	chr7_nlr_26	partial (pseudogene)	286915613	286916867	-	10,3,12,7,11,11,11,11,11,11,11
chr7	chr7_nlr_27	complete	225878280	225881054	-	18,15,1,4,5,10,3,7,9,11,11		TIR
chr7	chr7_nlr_28	complete	100640995	100644711	-	18,15,1,4,5,10,3,12,7,11,11,11,11,11,11,11,11,11,11,11,9,11,11,11		TIR		Yes	jg366622
chr7	chr7_nlr_29	partial (pseudogene)	93039178	93040066	-	13,1,4,5,10		TIR
chr7	chr7_nlr_3	complete (pseudogene)	226475072	226479442	+	18,15,1,4,5,10,3,7,9,11,11,11,19		TIR
chr7	chr7_nlr_30	partial (pseudogene)	58344244	58345425	-	18,15,1,4,5,10		TIR
chr7	chr7_nlr_4	complete (pseudogene)	286618965	286628748	+	18,15,1,4,5,10,3,12,7,11,11,11,11,11		TIR
chr7	chr7_nlr_5	complete (pseudogene)	334074936	334078335	+	18,15,1,4,5,10,3,12,7,9,11,11,11,11,11,11,11,11,11		TIR
chr7	chr7_nlr_6	partial (pseudogene)	334298928	334300890	+	18,15,1,4,5,3,12,7,20		TIR		Yes	jg405790
chr7	chr7_nlr_7	complete (pseudogene)	553498320	553501033	+	17,1,4,5,10,3,2,8,7,11,9,9,9,11,9,11,11,11,11,19	CC			Yes	jg444745.2
chr7	chr7_nlr_8	complete (pseudogene)	553579905	553582618	+	17,1,4,5,10,3,2,8,7,11,9,9,9,11,9,11,11,11,11,19	CC
chr7	chr7_nlr_9	complete (pseudogene)	553661037	553663216	+	1,4,5,10,3,2,8,7,11,9,9,9,11,9,11,11,11,11,19	CC			Yes	jg444791
chr8	chr8_nlr_1	partial (pseudogene)	71684281	71685565	+	18,15,1,4,5,10,3		TIR
chr8	chr8_nlr_10	complete (pseudogene)	148902408	148904519	+	1,4,5,3,12,7,11,11,11,11,11
chr8	chr8_nlr_11	complete (pseudogene)	149847816	149849027	+	1,4,5,10,3,12,7,11
chr8	chr8_nlr_12	complete (pseudogene)	260813127	260816752	+	18,15,13,1,4,5,10,3,12,7,11,11,11,9,11,11,11,9,9,11,11		TIR
chr8	chr8_nlr_13	partial (pseudogene)	297982239	297982965	+	1,12,2,8,7	CC
chr8	chr8_nlr_14	complete	395062821	395065178	+	1,4,5,10,3,12,7,11,11,9,9,9,9,9,11,11
chr8	chr8_nlr_15	complete (pseudogene)	397906096	397909441	+	18,15,1,4,5,10,3,7,11,11,11,9,11,11,11,11,11		TIR
chr8	chr8_nlr_16	complete (pseudogene)	433713421	433717239	+	18,15,1,4,5,10,3,12,7,11,11,11,11,9		TIR
chr8	chr8_nlr_17	complete	433895530	433904568	+	18,15,1,4,5,10,3,12,11,11,11,11,9,11,9,11,11,11,11,11,11,11,11,11,11,11,11,11,11,11,11,11,11,11,11,11,11,11,11,11,11,11,11,11,11,11,11,11,11,11,11		TIR		Yes	jg213968
chr8	chr8_nlr_18	complete	499595936	499598693	+	18,15,13,1,4,5,10,3,12,7,11,11,11,11		TIR		Yes	jg225702
chr8	chr8_nlr_19	complete (pseudogene)	502649220	502651915	+	18,15,14,1,6,4,5,10,3,12,2,7,11,9,9,11,11		TIR
chr8	chr8_nlr_2	complete	71723302	71728225	+	18,15,1,4,5,10,3,12,7,9,11,9		TIR
chr8	chr8_nlr_20	complete (pseudogene)	503705854	503708631	+	18,15,1,6,4,5,10,3,12,2,7,11,9,9,19,11,11,11		TIR
chr8	chr8_nlr_21	complete (pseudogene)	503832173	503834784	+	18,15,14,1,6,4,5,10,3,12,2,7,11,9,9,19,11		TIR
chr8	chr8_nlr_22	complete (pseudogene)	503895729	503903914	+	18,15,14,1,6,4,5,10,3,12,2,7,11,9,9,11,11		TIR
chr8	chr8_nlr_23	partial (pseudogene)	504982943	504983838	+	1,4,5,10,3,12,7
chr8	chr8_nlr_24	complete	508542213	508544778	+	17,16,1,6,4,5,10,3,12,2,7,11,9,9,11,11,11,11,11	CC
chr8	chr8_nlr_25	complete	523042513	523045873	+	18,1,4,5,3,12,7,11,11,11,11,11,11,11		TIR
chr8	chr8_nlr_26	complete	523162143	523165062	+	13,1,4,10,3,12,7,11,11,11		TIR
chr8	chr8_nlr_27	complete	567864015	567867661	+	18,13,1,4,5,10,3,12,7,11,11,11,11,11,11,9,11,11,11,11,11,11		TIR
chr8	chr8_nlr_28	complete	567989846	567993843	+	17,1,4,5,10,19,11,11,11,11,11,11	CC
chr8	chr8_nlr_29	complete (pseudogene)	571740797	571747928	+	18,15,1,4,5,19		TIR
chr8	chr8_nlr_3	complete	71832406	71835026	+	15,1,4,5,10,3,12,7,9,11		TIR
chr8	chr8_nlr_30	complete	572251357	572254934	+	18,15,1,4,5,10,3,12,7,11,9,11,11,11,11,11,11,11,9,11,11,11		TIR		Yes	jg238024
chr8	chr8_nlr_31	complete	572771599	572775114	+	18,13,1,4,5,10,3,12,7,11,9,11,11,11,11,11,9,11,11		TIR
chr8	chr8_nlr_32	complete	585969047	585973687	+	18,15,1,6,4,5,10,3,12,2,7,9,9,9,9,11,11,11,9		TIR
chr8	chr8_nlr_33	complete (pseudogene)	586127853	586132658	+	18,15,1,6,4,5,10,3,12,2,7,11,9,9,9,11,11,9		TIR
chr8	chr8_nlr_34	complete	609692338	609695201	+	18,15,1,6,4,5,10,3,12,2,7,11,9,9,11,11,11		TIR		Yes	jg244569
chr8	chr8_nlr_35	complete	609742264	609745099	+	18,15,1,6,4,5,10,3,12,2,7,11,9,9,11,11,11		TIR
chr8	chr8_nlr_36	partial (pseudogene)	610098851	610100666	+	18,15,1,4,10,3,12,2,7		TIR
chr8	chr8_nlr_37	complete (pseudogene)	620049177	620052779	+	17,16,1,6,10,3,12,2,8,7,9,19,11	CC
chr8	chr8_nlr_38	partial (pseudogene)	620054846	620057528	+	13,1,6,4,10,3	CC	TIR
chr8	chr8_nlr_39	complete	622197289	622206024	+	18,15,1,4,5,10,3,12,7,11,11,11,11,11		TIR
chr8	chr8_nlr_4	partial (pseudogene)	71920525	71921681	+	18,13,1,4,5,10		TIR
chr8	chr8_nlr_40	complete	624951772	624954155	+	18,15,1,4,5,10,3,12,2,8,7,11,9,9,11		TIR
chr8	chr8_nlr_41	complete (pseudogene)	626467323	626469803	+	17,1,6,4,5,10,3,12,2,7,9,9,11,11	CC
chr8	chr8_nlr_42	complete	626485483	626488117	+	17,16,1,6,4,5,10,3,12,2,7,9,9,9,11,11,11,9	CC			Yes	jg247860
chr8	chr8_nlr_43	complete (pseudogene)	634296377	634302096	+	17,16,1,6,4,10,3,12,2,7,9,9,9,19	CC
chr8	chr8_nlr_44	complete	634407086	634409619	+	17,16,1,6,4,5,10,12,2,7,9,11,11,11	CC
chr8	chr8_nlr_45	complete (pseudogene)	637987800	637990344	+	17,1,6,4,5,10,3,12,2,7,9,9,9,19,9,11,11,11	CC
chr8	chr8_nlr_46	partial (pseudogene)	639162036	639162612	+	2,8,7
chr8	chr8_nlr_47	complete (pseudogene)	639895140	639897678	+	17,16,1,6,4,5,10,3,12,2,7,9,9,9,11,11,11	CC
chr8	chr8_nlr_48	complete	646597000	646599565	+	17,16,1,6,4,10,3,12,2,7,9,9,11,11,11	CC			Yes	jg251759
chr8	chr8_nlr_49	complete (pseudogene)	648125042	648127505	-	17,16,1,6,4,10,3,12,2,7,9,9,11,11	CC			Yes	jg252049
chr8	chr8_nlr_5	complete	71926629	71929978	+	18,15,1,4,5,10,3,12,7,9,11		TIR		Yes	jg148303.1
chr8	chr8_nlr_50	partial (pseudogene)	646349020	646350154	-	18,15,1,4,5		TIR		Yes	jg251712
chr8	chr8_nlr_51	complete	646190933	646194528	-	18,15,1,4,5,10,3,7,11,11,11,11,11,11,11,11,11,11,11		TIR		Yes	jg251693
chr8	chr8_nlr_52	complete (pseudogene)	641497511	641501565	-	1,4,5,10,3,12,7,11,11,11,11,11,11,11,11,11,11,11,19
chr8	chr8_nlr_53	partial	641422658	641423102	-	1,4,5,10				Yes	jg250804
chr8	chr8_nlr_54	complete (pseudogene)	633109036	633111581	-	17,1,6,4,5,10,3,12,2,7,9,9,11,11,11	CC
chr8	chr8_nlr_55	complete	633039226	633041782	-	17,16,1,6,4,5,10,3,12,2,7,9,9,11,11,11	CC
chr8	chr8_nlr_56	complete	632987442	632989981	-	17,16,1,6,4,5,10,3,12,2,7,9,9,11,11,11	CC			Yes	jg249137
chr8	chr8_nlr_57	complete	626782024	626784658	-	17,16,1,6,4,5,10,3,12,2,7,9,9,9,11,11,11,9	CC
chr8	chr8_nlr_58	complete	626725389	626728023	-	17,16,1,6,4,5,10,3,12,2,7,9,9,9,11,11,11,9	CC
chr8	chr8_nlr_59	complete	626708066	626710625	-	17,16,1,6,4,5,10,3,12,2,7,9,9,11,9,11,11,11	CC
chr8	chr8_nlr_6	partial (pseudogene)	72266673	72268308	+	18,15,1,4,5,10,3,7		TIR
chr8	chr8_nlr_60	complete	624637372	624640150	-	18,13,1,6,4,5,10,3,12,2,7,9,9,9,11,11		TIR
chr8	chr8_nlr_61	partial (pseudogene)	622447766	622449242	-	18,15,13,1,4,5,10,3,7		TIR
chr8	chr8_nlr_62	partial	622379702	622381317	-	18,15,13,1,4,5,10,3,7		TIR
chr8	chr8_nlr_63	complete (pseudogene)	622342290	622345443	-	18,15,13,1,4,5,10,3,12,7,11,11,11,11,11		TIR		Yes	jg247085
chr8	chr8_nlr_64	complete	621461723	621464466	-	18,15,13,1,4,5,10,3,12,7,11,11,11		TIR		Yes	jg246947
chr8	chr8_nlr_65	partial (pseudogene)	621107878	621114681	-	18,15,1,4,5,10,3,7		TIR
chr8	chr8_nlr_66	complete	620993362	620996057	-	18,15,13,1,4,5,10,3,7,11,11,11,11		TIR		Yes	jg246873
chr8	chr8_nlr_67	complete (pseudogene)	620973587	620983739	-	18,15,13,1,4,5,10,3,12,7,11,11		TIR
chr8	chr8_nlr_68	partial	620942209	620944790	-	18,15,13,4,5,10,3,12,7,11,11		TIR		Yes	jg246869
chr8	chr8_nlr_69	partial (pseudogene)	620100853	620102320	-	17,16,1,6,4,5,10,3,12,8,7	CC
chr8	chr8_nlr_7	complete	72321707	72324501	+	18,15,1,4,5,10,3,12,7,9,11		TIR		Yes	jg148388
chr8	chr8_nlr_70	complete	612365819	612368551	-	17,16,1,6,4,5,10,3,12,2,7,9,9,9,9	CC
chr8	chr8_nlr_71	complete (pseudogene)	607559766	607564191	-	18,15,1,6,4,5,10,3,12,2,7,11,9,9,19,11,11,11,19		TIR		Yes	jg244193
chr8	chr8_nlr_72	complete (pseudogene)	607499151	607502119	-	18,15,1,6,4,5,10,3,12,2,7,11,9,9,11,11,11,19		TIR
chr8	chr8_nlr_73	partial (pseudogene)	607477849	607479639	-	18,15,1,6,4,5,10,3,12,2,7		TIR
chr8	chr8_nlr_74	partial (pseudogene)	605447783	605449085	-	18,15,13,1,4,5,10,3		TIR
chr8	chr8_nlr_75	complete (pseudogene)	589971427	589975090	-	18,13,1,4,5,10,3,12,7,11,11,11,11,11,11,11,11,11,11,11,11,11,11		TIR
chr8	chr8_nlr_76	partial (pseudogene)	574325627	574328309	-	10,12,2,8	CC
chr8	chr8_nlr_77	complete (pseudogene)	571634963	571638710	-	18,13,1,4,5,10,3,12,7,11,9,11,11,11,11,11,11,9,11,11,11		TIR
chr8	chr8_nlr_78	complete	519632525	519635246	-	18,15,13,1,4,5,10,3,12,7,11,11,11		TIR		Yes	jg229335.2
chr8	chr8_nlr_79	complete	502562689	502568346	-	18,15,1,4,5,10,3,12,7,11,11,11,11,11,11,11,11,11,11,11,11,11,11,11,11,11,11,11,11,11,11,11		TIR		Yes	jg226398
chr8	chr8_nlr_8	complete	72625805	72628582	+	18,15,1,4,5,10,3,12,7,9,11,11		TIR		Yes	jg148454
chr8	chr8_nlr_80	complete	499547865	499550827	-	18,15,13,1,4,5,10,3,12,7,11,11,11		TIR		Yes	jg225695
chr8	chr8_nlr_81	partial	481107569	481107812	-	3,12,2				Yes	jg222581
chr8	chr8_nlr_82	complete	475302232	475304748	-	1,5,10,3,11,11,11,11,11,11,11,11,11,11,11,11,11				Yes	jg221434
chr8	chr8_nlr_83	complete (pseudogene)	414298839	414302847	-	1,4,5,10,3,12,7,11,11,11,11,11,11,11,11,11,11,11,11,11,9,11,9
chr8	chr8_nlr_84	complete (pseudogene)	390952559	390955909	-	18,15,1,4,5,10,3,12,7,11,11,11,11,11,11,11,9,11,11		TIR		Yes	jg206001
chr8	chr8_nlr_85	partial	381972897	381974938	-	18,1,4,5,10,3		TIR
chr8	chr8_nlr_86	partial (pseudogene)	333876660	333877867	-	13,6,4,5	CC	TIR
chr8	chr8_nlr_87	partial (pseudogene)	148900821	148901697	-	1,4,5,10,12,7
chr8	chr8_nlr_88	partial	145071896	145072656	-	1,6,4,5,10,3,12,2	CC
chr8	chr8_nlr_89	complete	145065117	145067704	-	17,16,1,6,4,5,10,3,12,2,7,11,9,9,11,11,11	CC
chr8	chr8_nlr_9	partial	86369950	86370261	+	1,4,5
chr8	chr8_nlr_90	complete	72579866	72582650	-	18,15,1,4,5,10,3,12,7,9,11		TIR
chr8	chr8_nlr_91	complete	72553762	72556557	-	18,15,1,4,5,10,3,12,7,9,11		TIR		Yes	jg148448
chr8	chr8_nlr_92	complete	72507149	72509945	-	18,15,1,4,5,10,3,12,7,9,11,11		TIR		Yes	jg148444
chr8	chr8_nlr_93	complete	44548490	44551238	-	1,4,5,7,11,11,9
chr8	chr8_nlr_94	complete	44398264	44400788	-	1,4,5,7,11,11,9				Yes	jg143386
chr9	chr9_nlr_1	complete (pseudogene)	29984541	29993977	+	18,15,1,4,5,10,3,12,7,11,11,11,11,9,11,9,11,11,11,11,11,11,11,11,11,11,11,11,11,11,11,11,11,11,11,11,11,11,11,11,11,11,11,11,11,11,11,11,11,11,11,11,11		TIR
chr9	chr9_nlr_10	complete (pseudogene)	166174162	166176637	+	18,1,6,4,5,10,3,12,2,7,11,9,9,11,19	CC	TIR
chr9	chr9_nlr_11	complete (pseudogene)	281709957	281711361	+	1,6,4,5,10,3,12,2,7,9,9,19	CC
chr9	chr9_nlr_12	complete (pseudogene)	310224459	310229350	+	18,15,1,4,5,10,3,7,9,11,11,11,11,11		TIR
chr9	chr9_nlr_13	complete	325549667	325552770	+	18,15,13,1,4,5,10,3,12,7,9,11,11,9,11,9,9,11,9,9,11		TIR		Yes	jg1238894
chr9	chr9_nlr_14	complete	325555257	325558350	+	18,15,13,1,4,5,10,3,7,11,9,11,11,9,11,9,9,11,9,9,11		TIR		Yes	jg1238895
chr9	chr9_nlr_15	complete	361058305	361060093	+	1,4,5,10,3,12,7,11,11,11,9,9,9,11,11,11,11,11,11,11				Yes	jg1245383
chr9	chr9_nlr_16	complete (pseudogene)	361958136	361960376	+	1,4,5,10,3,7,11,11,11,11,11,11,11,11,11,11,11,11
chr9	chr9_nlr_17	complete (pseudogene)	440914934	440916599	+	1,4,5,3,7,9,11,11,11,11,11,11,11
chr9	chr9_nlr_18	partial	447307116	447307676	+	1,5,10,3
chr9	chr9_nlr_19	complete	569888819	569890567	+	1,4,5,10,3,12,7,11,11,11,11,11,11,11
chr9	chr9_nlr_2	partial (pseudogene)	38671264	38672909	+	18,13,1,4,5,10,3		TIR
chr9	chr9_nlr_20	partial (pseudogene)	617748888	617750738	+	4,5,10,3,12,7,11,11,11,11				Yes	jg1290848
chr9	chr9_nlr_21	partial	619683324	619685236	+	6,4,5,10,3,12,2,8,7,9,11,9,9,11,11,11,11,11	CC
chr9	chr9_nlr_22	partial (pseudogene)	619741880	619744592	+	18,13,1,4,5,10,3,12		TIR
chr9	chr9_nlr_23	complete	623793727	623796890	+	18,13,1,4,5,10,3,12,7,11,11,11,11,11,11,11		TIR		Yes	jg1291829
chr9	chr9_nlr_24	complete	625458149	625463989	+	18,15,1,4,5,10,3,12,7,11,11,11,11,11,11		TIR		Yes	jg1292204
chr9	chr9_nlr_25	partial (pseudogene)	632761713	632763209	+	18,13,1,4,5,3,12		TIR
chr9	chr9_nlr_26	complete (pseudogene)	632787271	632789583	+	1,4,5,10,3,12,7,11,11,11,11,11
chr9	chr9_nlr_27	complete (pseudogene)	632803695	632806007	+	1,4,5,10,3,12,7,11,11,11,11,11				Yes	jg1293584.3
chr9	chr9_nlr_28	complete (pseudogene)	632827909	632832996	+	18,13,1,4,5,10,3,12,2,7,11,11,11,11,11,11		TIR		Yes	jg1293584.3
chr9	chr9_nlr_29	complete	623505668	623509983	-	18,13,1,4,5,10,3,12,7,11,11,11,11,11		TIR		Yes	jg1291774
chr9	chr9_nlr_3	complete	46304963	46309159	+	18,13,1,4,5,10,3,12,7,11,11,11,11,11		TIR		Yes	jg1190787
chr9	chr9_nlr_30	complete	396177785	396180208	-	18,15,1,4,5,10,3,9,11,11,11		TIR
chr9	chr9_nlr_31	partial (pseudogene)	370563383	370564954	-	18,15,1,4,5		TIR
chr9	chr9_nlr_32	complete	343277575	343280071	-	1,4,5,10,3,8,7,11,11,11,11,11,9,11,11,9,9,11,11,11,11,11,11,11,11				Yes	jg1241995
chr9	chr9_nlr_33	complete	342408936	342411876	-	1,4,5,10,3,7,19,11,11,11,11,11,11,11,11,11,11,11,11,11,11,11,11,11,11,11,11,11,11,11,11				Yes	jg1241839
chr9	chr9_nlr_34	complete (pseudogene)	342271559	342279349	-	1,4,5,10,3,8,11,11,11,11,11,11,11,11,11,11,11,11,11,11
chr9	chr9_nlr_35	complete (pseudogene)	341958149	341965023	-	18,15,1,4,5,10,8,7,11,11,11,11,11,11,9,11,11,11,11,11,11,11,11,11,11,11,11		TIR
chr9	chr9_nlr_36	complete (pseudogene)	325908002	325911095	-	18,13,1,4,5,10,2,7,11,9,11,11,9,11,9,9,11,11,9,11		TIR		Yes	jg1238940
chr9	chr9_nlr_37	complete	315591082	315593518	-	1,4,5,10,3,12,7,11,11,11,11,11,11,11,11,11,11,11,11,11,11,11,11				Yes	jg1237094
chr9	chr9_nlr_38	complete	311172838	311177558	-	18,15,1,4,5,10,7,9,9,11,11,11		TIR		Yes	jg1236253
chr9	chr9_nlr_39	partial (pseudogene)	310798096	310799368	-	18,15,4,5,10,3		TIR
chr9	chr9_nlr_4	partial	47135022	47137759	+	18,13,1,4,5,10,3,12,7		TIR		Yes	jg1190950
chr9	chr9_nlr_40	complete	310776551	310781216	-	18,15,1,4,5,10,3,7,9,11,9,11		TIR		Yes	jg1236174
chr9	chr9_nlr_41	complete	310466964	310471728	-	18,15,1,4,5,10,3,7,11,11,9,9,11		TIR		Yes	jg1236099
chr9	chr9_nlr_42	complete	308729689	308732440	-	18,15,1,4,5,10,3,7,9,11,11,11		TIR		Yes	jg1235793
chr9	chr9_nlr_43	complete	281579077	281583133	-	18,15,1,4,5,3,12,7,11,11,11,11,11,11,11,11,11,11,11,11,11,11,11,11		TIR
chr9	chr9_nlr_44	complete	38308659	38311759	-	18,15,1,4,5,10,3,12,7,11,11,11,11,11,9,9,11,11,11,11		TIR
chr9	chr9_nlr_5	complete (pseudogene)	47173647	47177842	+	18,13,1,4,5,10,3,12,7,11,11,11,11,11		TIR		Yes	jg1190961
chr9	chr9_nlr_6	complete	47274802	47279018	+	18,13,1,4,5,10,3,12,7,11,11,11,11		TIR
chr9	chr9_nlr_7	complete	58430854	58434813	+	18,13,1,4,5,10,3,12,7,11,11		TIR		Yes	jg1193182
chr9	chr9_nlr_8	partial	95219101	95219839	+	1,4,5,3				Yes	jg1199795
chr9	chr9_nlr_9	complete	140414731	140418374	+	18,13,1,4,5,10,3,12,7,11,11,11,11,11,9,11,9,9,11,11		TIR		Yes	jg1207095
Positions and details of 984 NLR genes detected by NLR annotator. Consensus NLRs (predicted NLRs supported by annotation) are highlighted in purple.
